# Supplementary material for: Tetrathiafulvalene-based covalent organic frameworks for ultrahigh iodine capture
Source: Royal Society of Chemistry journal article supplement (doi:10.1039/d1sc01742j), 2021-01-01
Supplement: d1sc01742j1.pdf [file d1sc01742j1.pdf]

## Supplemental information

### **Tetrathiafulvalene-based covalent organic frameworks for ultrahigh iodine capture**

*Jianhong Chang, Hui Li, Jie Zhao, Xinyu Guan, Cuimei Li, Guangtao Yu, Valentin Valtchev, Yushan Yan, Shilun Qiu and Qianrong Fang\**

## Table of contents

|                   |                                              |       |
|-------------------|----------------------------------------------|-------|
| <b>Section 1</b>  | Materials and characterization               | 3-10  |
| <b>Section 2</b>  | Optimization of molecular structures         | 11    |
| <b>Section 3</b>  | SEM and TEM images                           | 12-13 |
| <b>Section 4</b>  | FT-IR spectroscopy                           | 14    |
| <b>Section 5</b>  | Solid-state <sup>13</sup> C NMR spectroscopy | 15    |
| <b>Section 6</b>  | Structural analysis                          | 16-19 |
| <b>Section 7</b>  | Structural stability                         | 20-21 |
| <b>Section 8</b>  | Thermal gravity analysis                     | 22    |
| <b>Section 9</b>  | Nitrogen gas adsorption                      | 23-24 |
| <b>Section 10</b> | Adsorption of iodine                         | 25-36 |
| <b>Section 11</b> | Electrochemical behavior                     | 37    |
| <b>Section 12</b> | Theoretical study                            | 38    |
| <b>Section 13</b> | Unit cell parameters                         | 39-45 |
| <b>Section 14</b> | References                                   | 46-48 |

## Section 1: Materials and characterization

### 1.1 Materials

All starting materials and solvents, unless otherwise noted, were obtained from J&K scientific LTD. The reagents and purity of the solvents were of 95% and used without further purification. 2,3,6,7-tetra(4-formylphenyl)tetrathiafulvalene (TFP-TTF)<sup>1</sup>, 2',5'-dimethyl-[1,1':4',1''-terphenyl]-4,4''-diamine (DTDA)<sup>2</sup>, and 2,4,6-tris(4-aminophenyl)amine (TAPA)<sup>3</sup> were synthesized using a modified literature method. All products were isolated and handled under nitrogen using either glovebox or Schlenk line techniques.

### 1.2 Instruments

A Bruker AV-400 NMR spectrometer was applied to record the liquid <sup>1</sup>H NMR spectra. Solid-state <sup>13</sup>C NMR spectra were recorded on an AVIII 500 MHz solid-state NMR spectrometer. The FT-IR spectra (KBr) were obtained using a SHIMADZU IRAffinity-1 Fourier transform infrared spectrophotometer. Thermogravimetric analysis (TGA) was recorded on a SHIMADZU DTG-60 thermal analyzer under N<sub>2</sub>. The operational range of the instrument was from 30 °C to 600 °C at a heating rate of 10 °C min<sup>-1</sup> with N<sub>2</sub> flow rate of 30 mL min<sup>-1</sup>. PXRD data were collected on a PANalytical B.V. Empyrean powder diffractometer using a Cu K $\alpha$  source ( $\lambda = 1.5418 \text{ \AA}$ ) over the range of  $2\theta = 2.0\text{--}40.0^\circ$  with a step size of  $0.02^\circ$  and 2 s per step. The sorption isotherm for N<sub>2</sub> was measured by using a Quantachrome Autosorb-IQ analyzer with ultra-high-purity gas (99.999% purity). Before gas adsorption measurements, the as-synthesized COFs (~50.0 mg) were immersed in DMF for 12 h (3  $\times$  5.0 ml) and then acetone for another 36 h (3  $\times$  5.0 ml). The acetone was then extracted under vacuum at 85 °C to afford the samples for sorption analysis. To estimate pore size distributions for TTF-COFs, nonlocal density functional theory (NLDFT) was applied to analyze the N<sub>2</sub> isotherm on the basis of the model of N<sub>2</sub>@77K on carbon with slit pores and the method of non-negative regularization. For scanning electron microscopy (SEM) images, JEOL JSM-6700 scanning electron microscope was applied. The transmission electron microscopy (TEM) images were obtained on JEM-2100 transmission electron microscopy. The Electrochemistry experiments were conducted on a CHI660C Electrochemical Workstation (Shanghai Chenhua Electrochemical

Instrument). Electron paramagnetic resonance (EPR) spectra were measured on JES-FA200. Raman scattering spectra were measured on INVIA, and the Raman band of the silicon wafer at  $520.7\text{ cm}^{-1}$  was used to calibrate the spectrometer. X-ray photoelectron spectroscopy (XPS) measurements were performed on an ESCALAB 250 XPS system.

### 1.3 Synthesis of 2,3,6,7-tetra(4-formylphenyl)tetrathiafulvalene (TFP-TTF)<sup>1</sup>

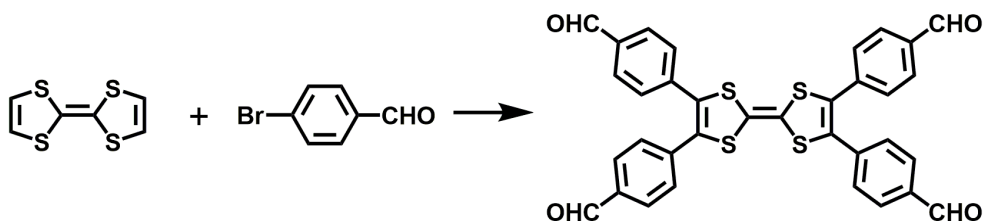

A THF (80.0 ml) mixture of tetrathiafulvalene (8.0 mmol, 1.64 g), 4-bromobenzaldehyde (40.0 mmol, 7.4 g),  $\text{Pd}(\text{OAc})_2$  (2.0 mmol, 0.45 g),  $\text{PtBu}_3\text{HBF}_4$  (4.4 mmol, 1.74 g), and  $\text{CsCO}_3$  (14.7 mmol, 9.6 g) was degassed by freeze-pump-thaw cycles, purged with argon, and refluxed 48 h. The mixture was extracted with chloroform and the combined organic layers were washed with brine, dried over anhydrous  $\text{Na}_2\text{SO}_4$ , and concentrated under reduced pressure. The residue was purified by using silica gel chromatography with dichloromethane as eluent to afford the TFP-TTF (2.2 g, 40%) as red black solid.  $^1\text{H NMR}$  (400 MHz,  $\text{CDCl}_3$ )  $\delta$ (ppm): 9.97 (s, 4 H), 7.78 (d,  $J = 8.0$ , 8 H), 7.36 (d,  $J = 8.0$ , 8 H).

#### 1.4 Synthesis of 2',5'-dimethyl-[1,1':4',1''-terphenyl]-4,4''-diamine (DTDA)<sup>2</sup>

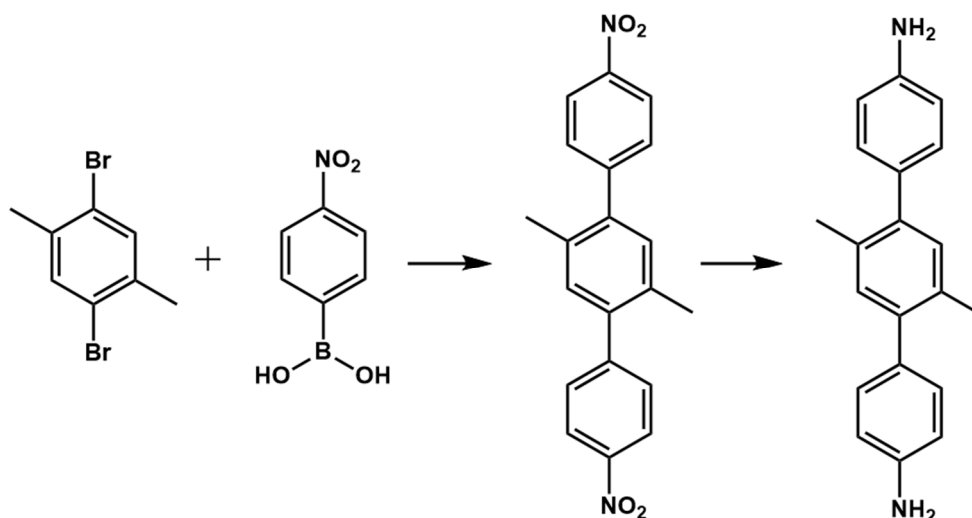

**2',5'-dimethyl-4,4''-dinitro-1,1':4',1''-terphenyl.** 1,4-Dibromo-2,5-dimethylbenzene (0.38 mmol, 0.10 g), 4-nitrophenyl boronic acid (0.95 mmol, 0.158 g), cesium carbonate (1.89 mmol, 0.617 g) and Pd(PPh<sub>3</sub>)<sub>4</sub> (0.04 mmol, 0.044 g) were mixed in pre-degassed 1,4-dioxane (7.5 mL) and H<sub>2</sub>O (1.5 mL) in a screw-capped Schlenk tube. The atmosphere was purified via 3 cycles of evacuation / N<sub>2</sub> fill before the tube was sealed. The mixture was heated at 100 °C for 12 h, and then partitioned between H<sub>2</sub>O and EtOAc. The insoluble solid was filtered to afford the desired product 2',5'-dimethyl-4,4''-dinitro-1,1':4',1''-terphenyl as light brown solid (0.066 g, 50%). <sup>1</sup>H-NMR (DMSO, 400 MHz)  $\delta$ (ppm): 8.31 (4 H, d,  $J$  = 6.76, Ph-H ortho to NO<sub>2</sub>), 7.71 (4 H, d,  $J$  = 6.76, Ph-H meta to NO<sub>2</sub>), 7.27 (2 H, s, Ph-H), 2.26 (6 H, s, CH<sub>3</sub>).

**DTDA.** 2',5'-dimethyl-4,4''-dinitro-1,1':4',1''-terphenyl (0.15 mmol, 0.053 g) and 10% Pd/C (0.01 mmol, 0.016 g) and hydrazine monohydrate (1.5 mmol, 0.25 ml) was mixed in EtOH (30.0 mL). The resulting mixture was heated under reflux for 6 h under nitrogen and then filtered when it was still hot. The filtrate was evaporated to dryness to afford DTDA as white solid (0.022 g, 50%). <sup>1</sup>H-NMR (CDCl<sub>3</sub>, 400 MHz)  $\delta$ (ppm): 7.17 (4 H, d,  $J$  = 6.48, Ph-H meta to

NH<sub>2</sub>), 7.11 (2 H, s, Ph-H), 6.74 (4 H, d, *J* = 6.52, Ph-H ortho to NH<sub>2</sub>), 3.70 (4 H, br, NH<sub>2</sub>), 2.27 (6 H, s, CH<sub>3</sub>).

### 1.5 Synthesis of 2,4,6-tris(4-aminophenyl)amine (TAPA)<sup>3</sup>

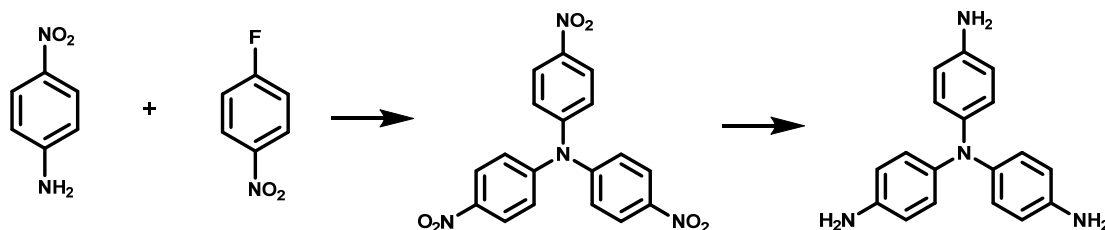

**2,4,6-Tris(4-nitrophenyl)amine (TNPA).** 1-Fluoro-4-nitrobenzene (8.0 mL, 0.08 mmol) was added to a suspension of 4-nitroaniline (5.0 g, 36.2 mmol) and K<sub>2</sub>CO<sub>3</sub> (30.0 g) in dry DMSO (40.0 mL) in a 100-mL two-neck bottle under a flow of N<sub>2</sub>. The mixture was heated at 120 °C for 48 h and then the solvent was removed under vacuum. The formed solid was suspended in methanol and collected via vacuum filtration. The compound was washed with H<sub>2</sub>O and methanol. Afterwards, the product was dried under vacuum overnight to yield a yellow solid of TNPA. <sup>1</sup>H NMR (DMSO-*d*<sub>6</sub>, 400 MHz)  $\delta$  (ppm): 8.26 (d, *J* = 12 Hz, 6 H), 7.36 (d, *J* = 10.8 Hz, 6 H).

**TAPA.** A suspension of tris(4-nitrophenyl)amine (10.0 g, 26.3 mmol) and palladium on activated carbon (0.658 g, 0.006 mmol) in dry 1,4-dioxane (46.0 mL) and EtOH (23.0 mL) was heated at 80 °C for 1 h in a 250-mL two-neck bottle under a flow of N<sub>2</sub> and then hydrazine monohydrate (26.3 mL, 0.84 mmol) was added. The mixture was heated at 80 °C for 48 h. Palladium on activated carbon was removed via vacuum filtration. Afterwards, the product was crystallized at low temperature. The precipitate was collected via vacuum filtration and

dried under vacuum overnight to yield a gray solid of TAPA.  $^1\text{H}$  NMR (DMSO- $d_6$ , 400 MHz)  $\delta$  (ppm): 6.58 (s, 6 H), 4.69 (s, 6 H), 6.44 (d,  $J = 10.2$  Hz, 6 H).

### 1.6 Synthesis of JUC-560

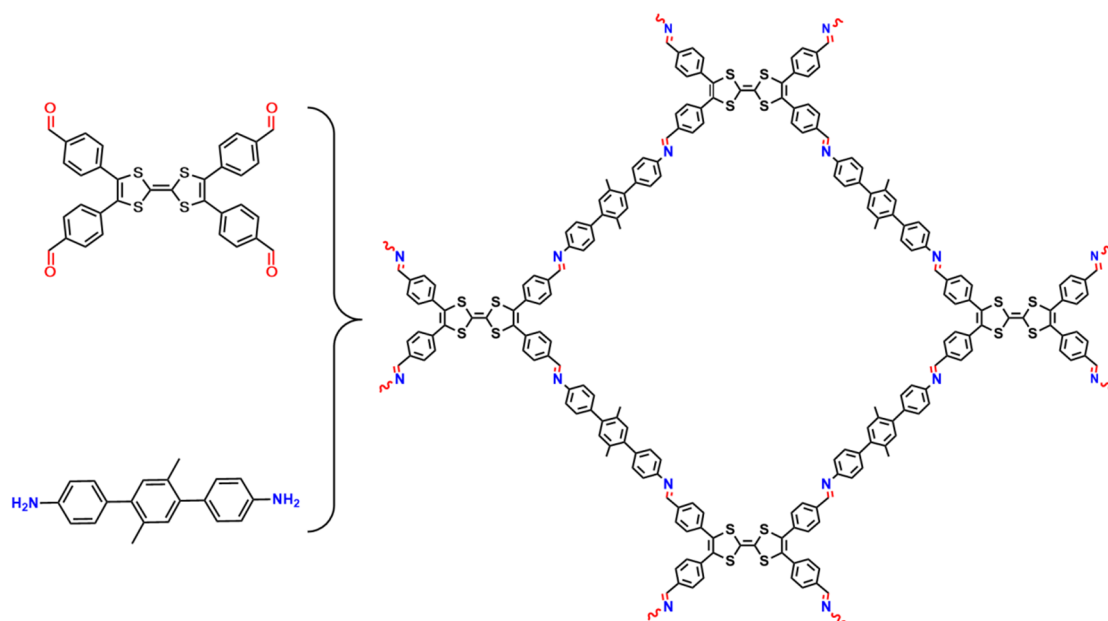

DTDA (0.05 mmol, 0.017 g) and TFP-TTF (0.025 mmol, 0.019 g) were weighed into a Pyrex tube (volume: ca. 20.0 ml with a body length of 18.0 cm and neck length of 9.0 cm). Then, the mixture of mesitylene (0.7 mL), 1,4-dioxane (0.3 mL) and 0.1 ml of aqueous acetic acid (6.0 mol/L) was added. The Pyrex tube was flash frozen in a liquid nitrogen bath and evacuated to an internal pressure of ca. 19.0 mbar and flame-sealed, reducing the total length by ca. 10.0 cm. Upon warming to room temperature, the tube was placed in an oven at 120 °C for three days. As a result, a pale brown powder was isolated by centrifugation and washed with acetone ( $3 \times 5.0$  ml) and the yield is about 83%. Anal. Calcd for  $\text{C}_{37}\text{H}_{26}\text{N}_2\text{S}_2$ : C: 78.97; H: 4.66; N: 4.98; S: 11.39. Found: C: 79.12; H: 4.61; N: 5.06; S: 11.21. Solid-state  $^{13}\text{C}$  NMR (500 MHz)  $\delta$  (ppm): 159.4, 150.8, 141.1, 131.9, 121.2, 20.2. FT-IR: (KBr),  $\nu/\text{cm}^{-1}$ : 3024.24, 2866.98, 2733.86, 2361.54, 1774.92, 1603.03, 1555.49, 1483.80, 1307.52, 1102.72, 1012.02, 840.13.

## 1.7 Synthesis of JUC-561

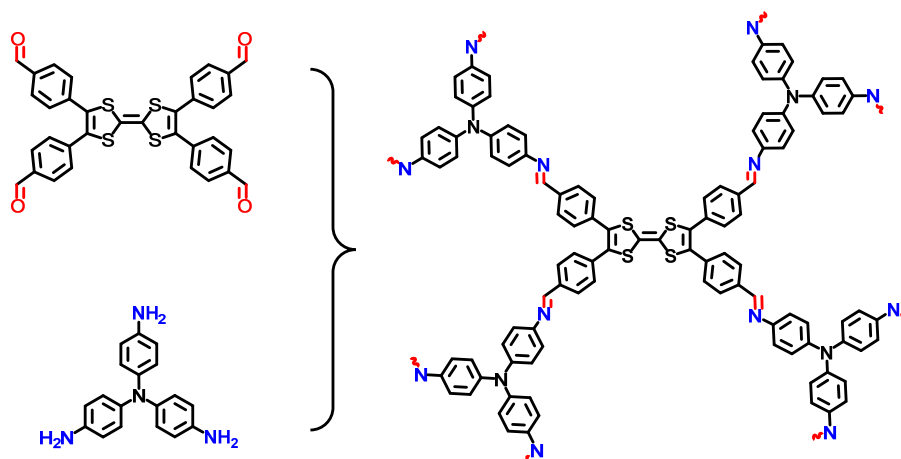

TAPA (0.04 mmol, 0.013 g) and TFP-TTF (0.03 mmol, 0.022 g) were weighed into a Pyrex tube (volume: ca. 20.0 ml with a body length of 18.0 cm and neck length of 9.0 cm). Then, the mixture of *o*-DCB (0.2 mL), *n*-BuOH (0.8 mL) and aqueous acetic acid (9.0 mol/L, 0.1 mL) was added. The Pyrex tube was flash frozen in a liquid nitrogen bath and evacuated to an internal pressure of ca. 19.0 mbar and flame-sealed, reducing the total length by ca. 10.0 cm. Upon warming to room temperature, the tube was placed in an oven at 120 °C for five days. As a result, a pale brown powder was isolated by centrifugation and washed with acetone (3 × 5.0 ml) and the yield is about 81%. Anal. Calcd for C<sub>87</sub>H<sub>54</sub>N<sub>8</sub>S<sub>6</sub>: C: 74.44; H: 3.88; N: 7.98; S: 13.70. Found: C: 74.46; H: 3.85; N: 7.99; S: 13.69. Solid-state <sup>13</sup>C NMR (500 MHz)  $\delta$  (ppm): 157.9, 155.4, 144.6, 135.9, 128.3. FT-IR: (KBr),  $\nu$ /cm<sup>-1</sup>: 3033.02, 2840.64, 2740.43, 1902.19, 1701.77, 1602.56, 1494.04, 1309.71, 1209.51, 1109.29, 832.81.

**1.8 General procedure for iodine vapor sorption.** An open small vial (2.0 mL) containing the COF sample (0.02 g) was placed in a large vial (10.0 mL) containing iodine (1.0 g). The large vial was sealed and kept in an oven at 60 °C. After a certain period, the large vial was cooled to room temperature. Then the sample was vacuumed at room temperature for 12 h



to remove the iodine on the surface. The small vial containing the COF sample was weighed and placed back into the iodine-containing large vial. The large vial was sealed and put back in the oven at 60 °C to continue the adsorption till the mass of the small vial containing the COF sample did not change.

**1.9 General procedure for recycling the COF samples.** The iodine-captured COF sample was added to ethanol (20.0 mL) in a vial at 25 °C, and ethanol was refreshed every 2 h until no color of the solution was observed. The COF sample was collected by filtration, washed with ethanol, dried under vacuum at 120 °C overnight and reused for the next cycle.

**1.10 General procedure for iodine escape investigation.** An open vial (2.0 mL) containing the iodine-loaded COF sample was placed in an empty large vial (10.0 mL). The large vial was sealed and kept in room temperature. Then the sample was vacuumed at room temperature for 12 h to remove the iodine on the surface. After a certain period, the small vial containing the COF sample was weighed and placed back into the empty large vial. The large vial was sealed to continue the desorption. The investigation was carried out for a period of 8 days.

**1.11 Cyclic voltammetry (CV) measurements.** After grinding each as-synthesized COF (6.0 mg) and carbon black (4.0 mg) in agate mortar and pestle for 10 mins, the ground powder was subjected to a mixture of water (0.25 mL), ethanol (0.25 mL) and Nafion solution (50.0 µL) and sonicated for 2 h. Then the electrode was prepared by drop-casting such mixture onto the surface of a fiber paper which was dried before use. The CV measurements were performed using an electrochemical analyzer CHI 760i E and a standard three-electrode setup with a carbon working electrode, platinum wire auxiliary electrode and Ag/AgCl as the reference

electrode. The scan rate was  $20 \text{ mV}\cdot\text{s}^{-1}$  with potential range 0 V to 1.5 V in supporting electrolyte (0.1 M  $\text{NBu}_4\text{PF}_6$  in  $\text{CH}_2\text{Cl}_2$ ).

## Section 2: Optimization of molecular structures

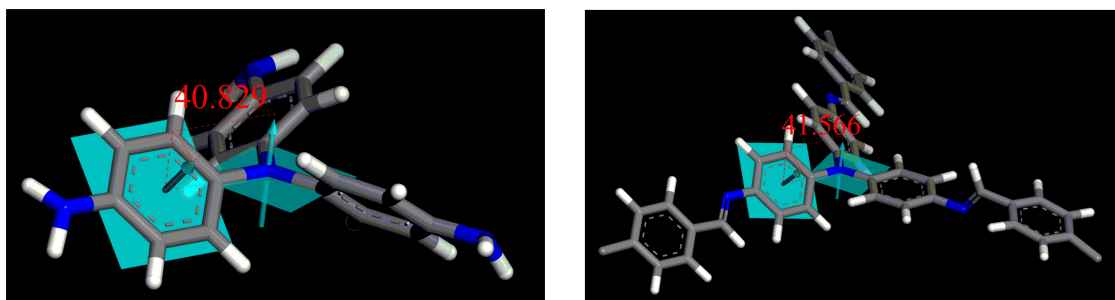

**Figure S1.** Twisted angles between benzene ring and central plane of TAPA (left) and JUC-561 (right) based on the optimization of molecular structures by Gaussian 09.

### Section 3: SEM and TEM images

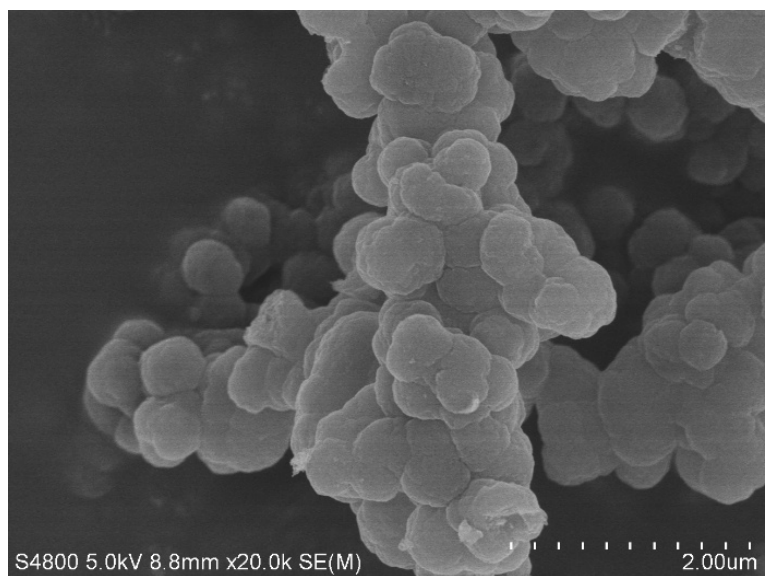

**Figure S2.** SEM image of as-synthesized JUC-560.

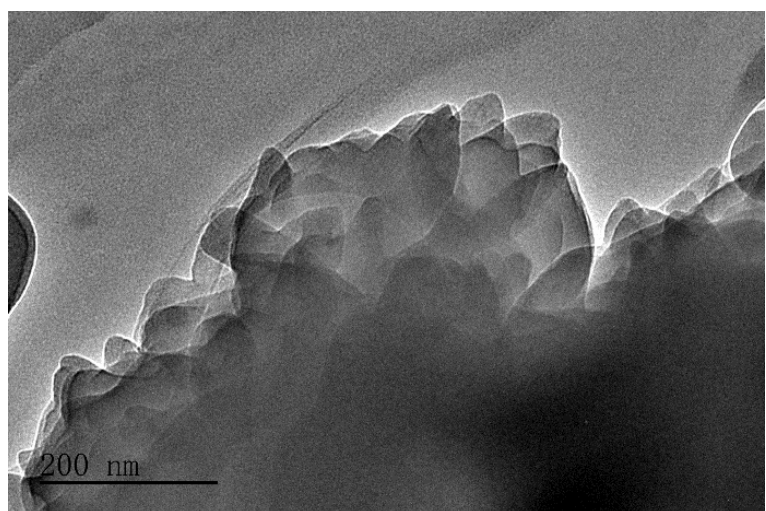

**Figure S3.** TEM image of as-synthesized JUC-560.

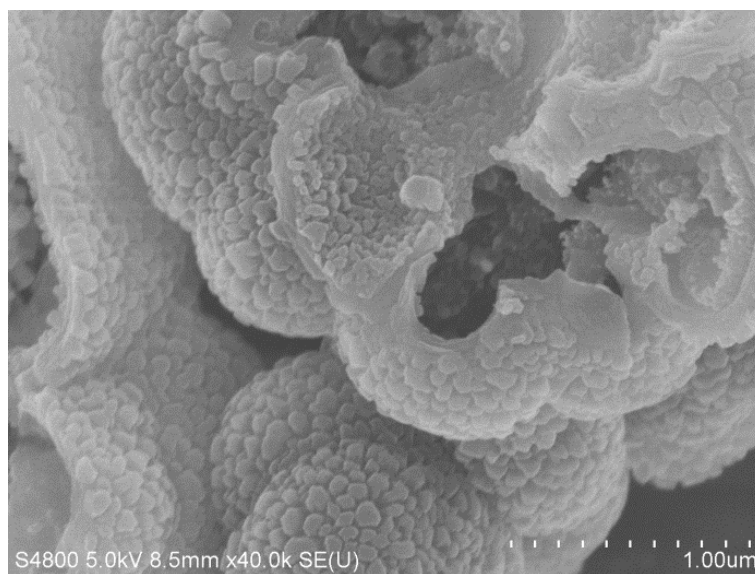

**Figure S4.** SEM image of as-synthesized JUC-561.

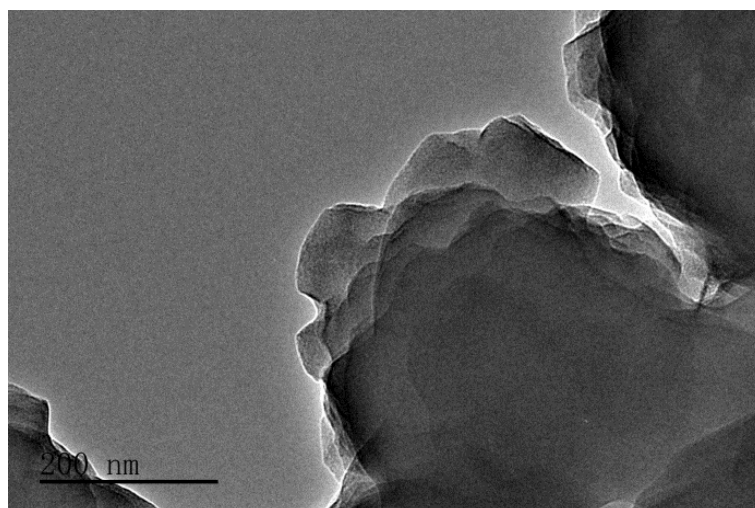

**Figure S5.** TEM image of as-synthesized JUC-561.

## Section 4: FT-IR spectroscopy

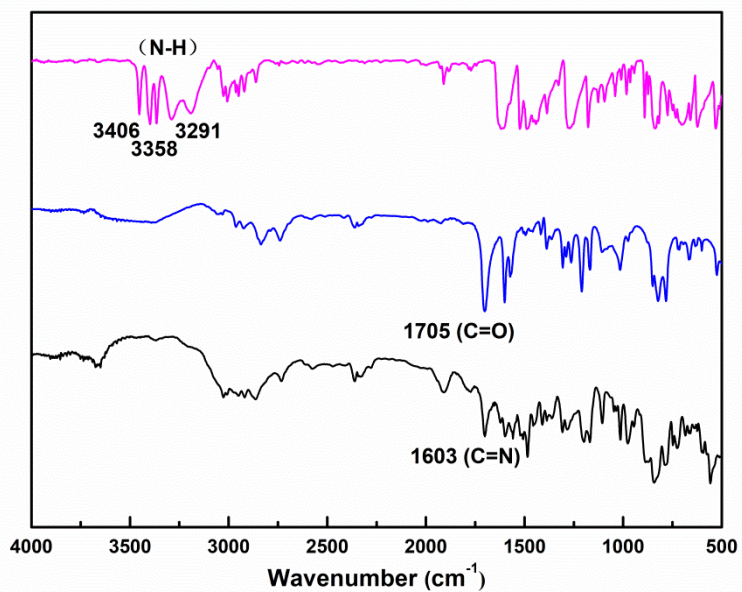

**Figure S6.** FT-IR spectra of JUC-560 (black), TFP-TTF (blue) and TAPT (pink).

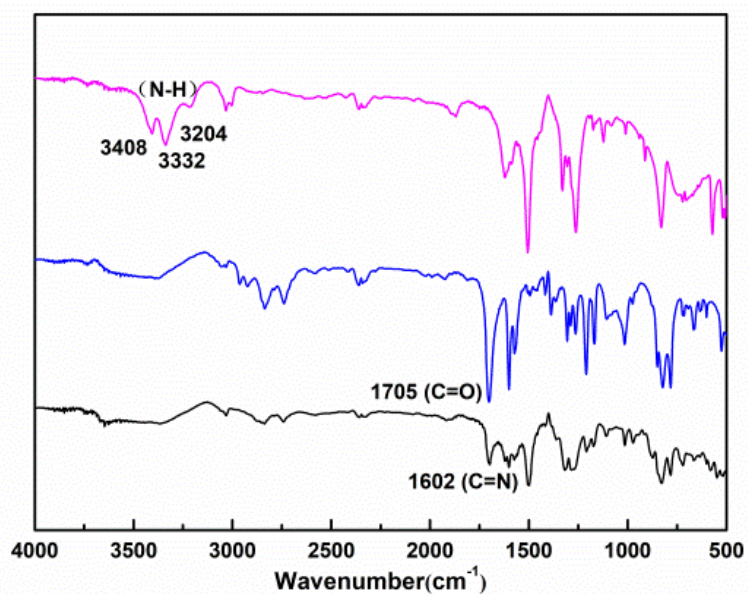

**Figure S7.** FT-IR spectra of JUC-561 (black), TFP-TTF (blue) and TAPA (pink).

## Section 5: Solid-state $^{13}\text{C}$ NMR spectroscopy

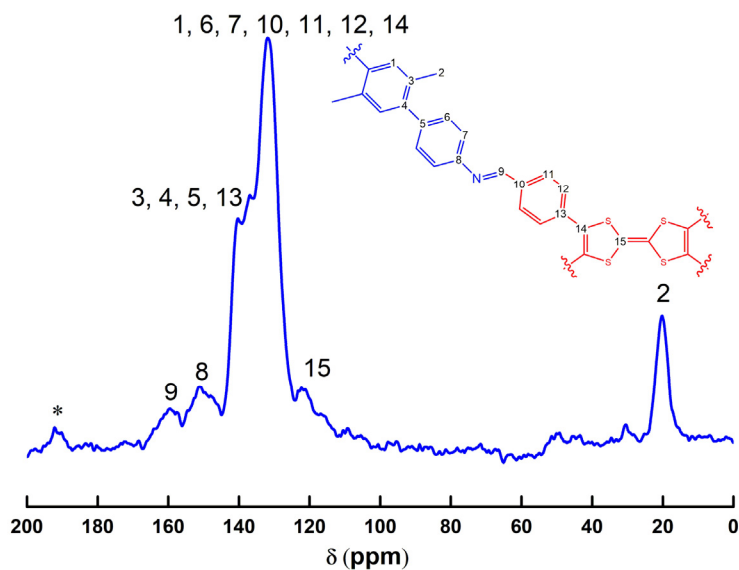

**Figure S8.** Solid state  $^{13}\text{C}$  NMR of JUC-560. Asterisks (\*) indicate peaks arising from spinning side bands.

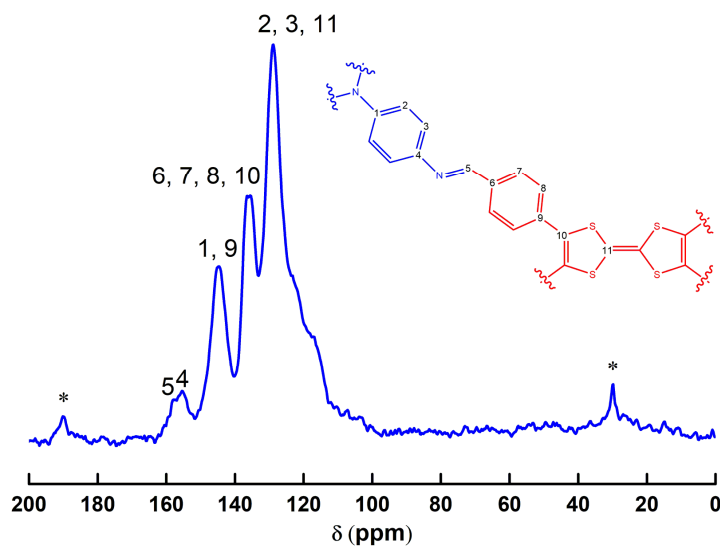

**Figure S9.** Solid state  $^{13}\text{C}$  NMR of JUC-561. Asterisks (\*) indicate peaks arising from spinning side bands.

## Section 6: Structural analysis

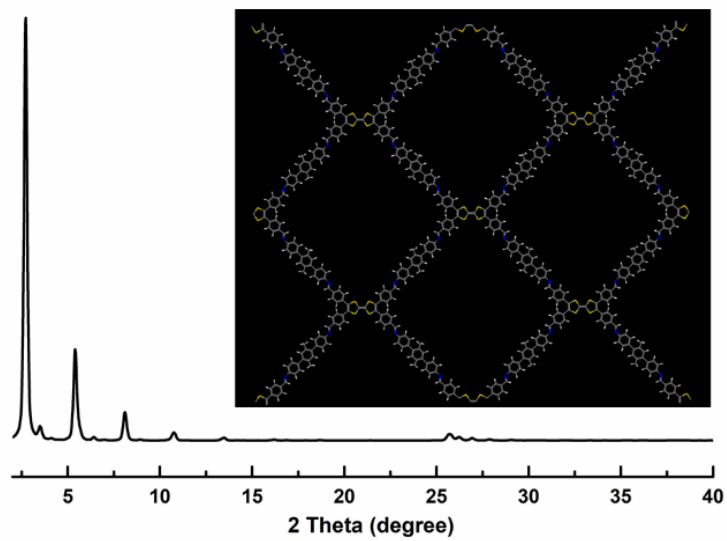

**Figure S10.** Calculated PXRD pattern of JUC-560 based on the AA-stacking **sql** net.

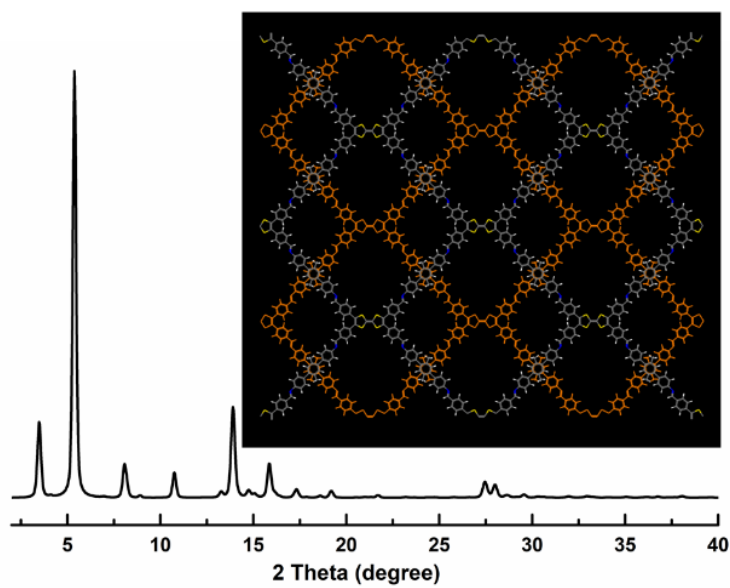

**Figure S11.** Calculated PXRD pattern of JUC-560 based on the AB-stacking **sql** net.



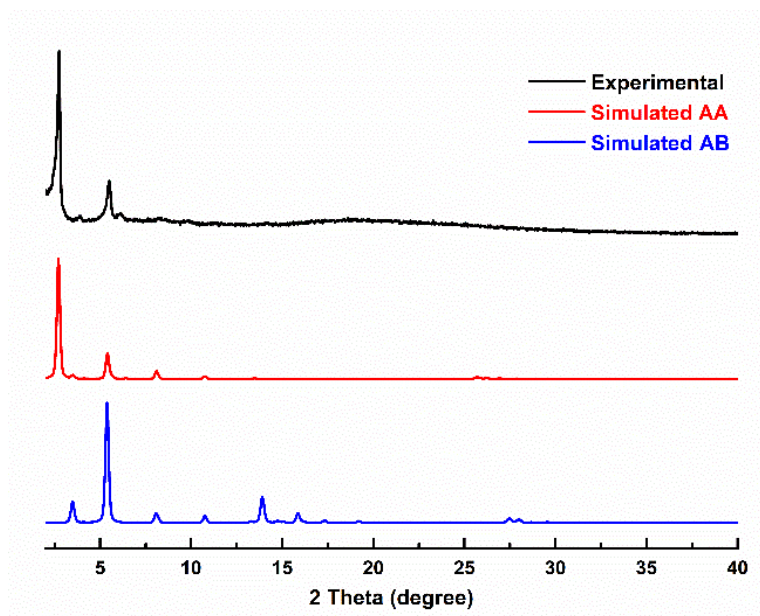

**Figure S12.** Comparison of PXRD patterns of JUC-560.

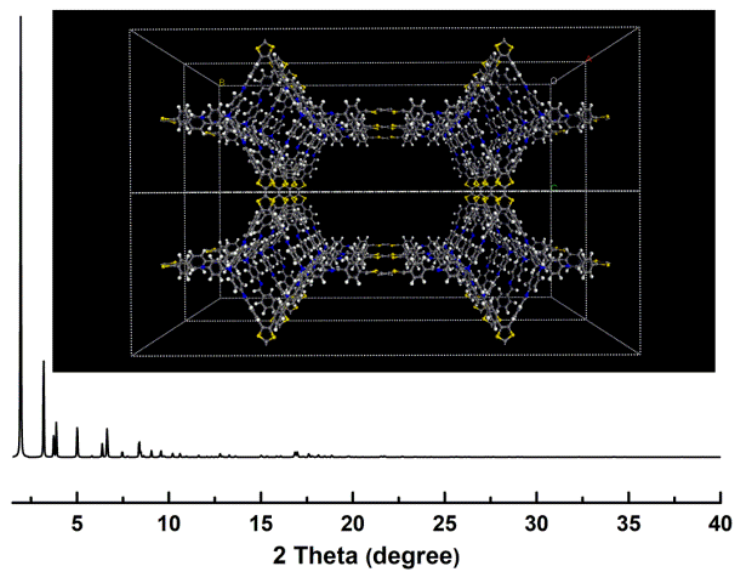

**Figure S13.** Calculated PXRD pattern of JUC-561 based on the **ffc** net.

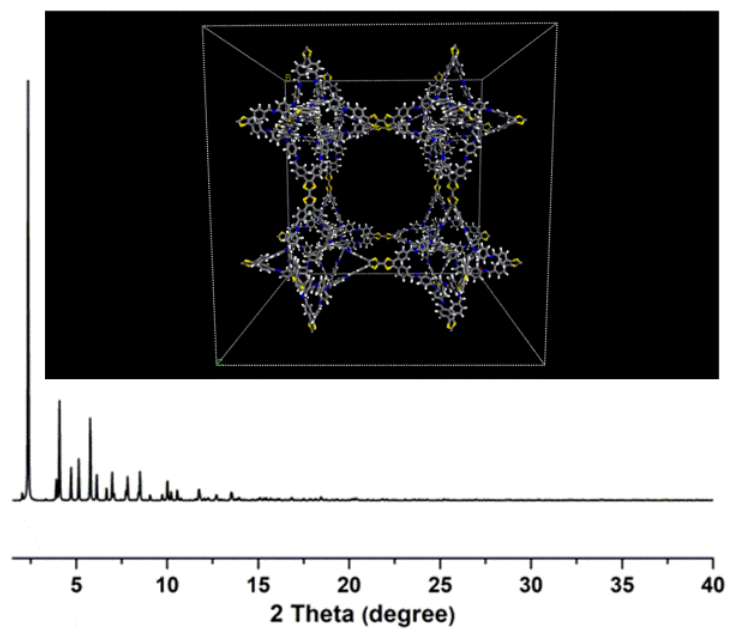

**Figure S14.** Calculated PXRD pattern of JUC-561 based on the **tbo** net.

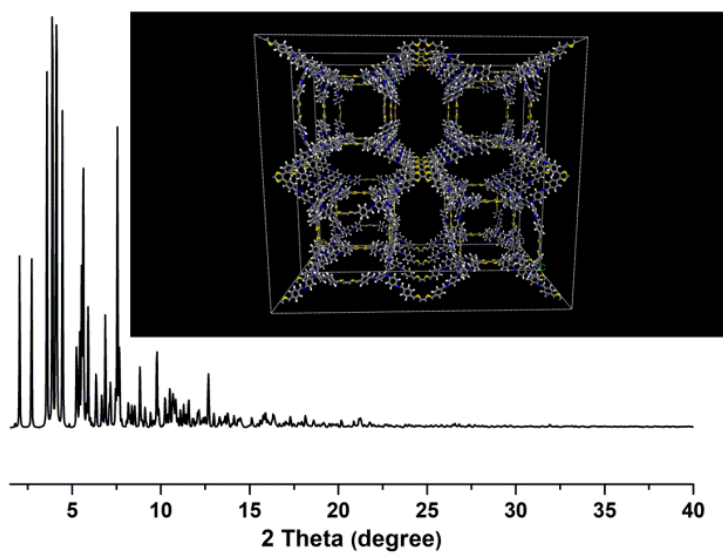

**Figure S15.** Calculated PXRD pattern of JUC-561 based on the **fjh** net.

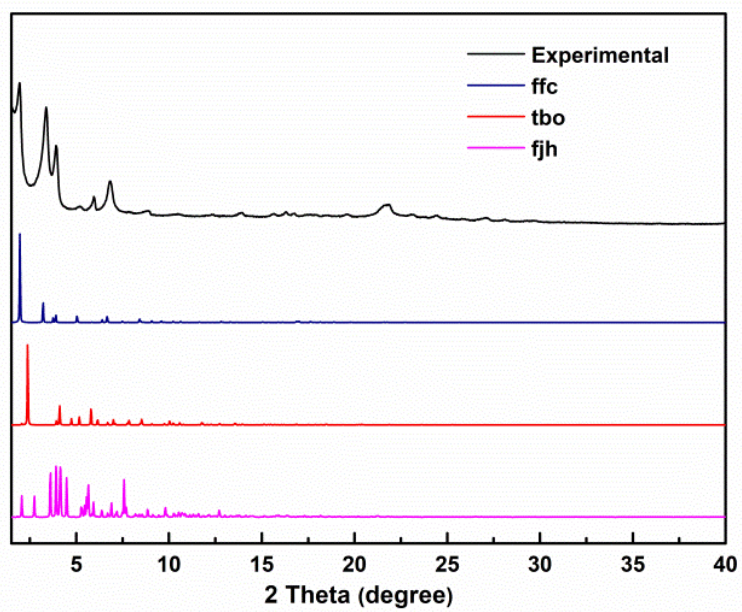

**Figure S16.** Comparison of PXRd patterns of JUC-561 based on different nets.

## Section 7: Structural stability

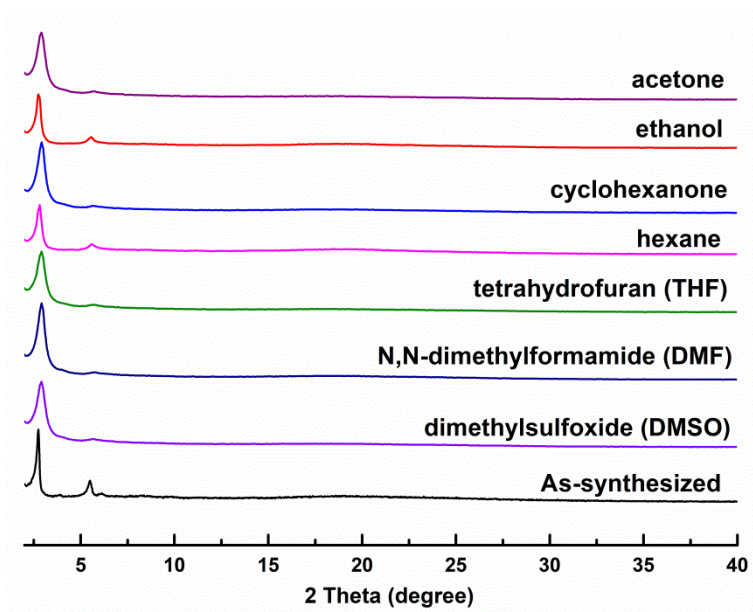

**Figure S17.** PXRD patterns of JUC-560 after the treatment in different organic solvents for 24 h.

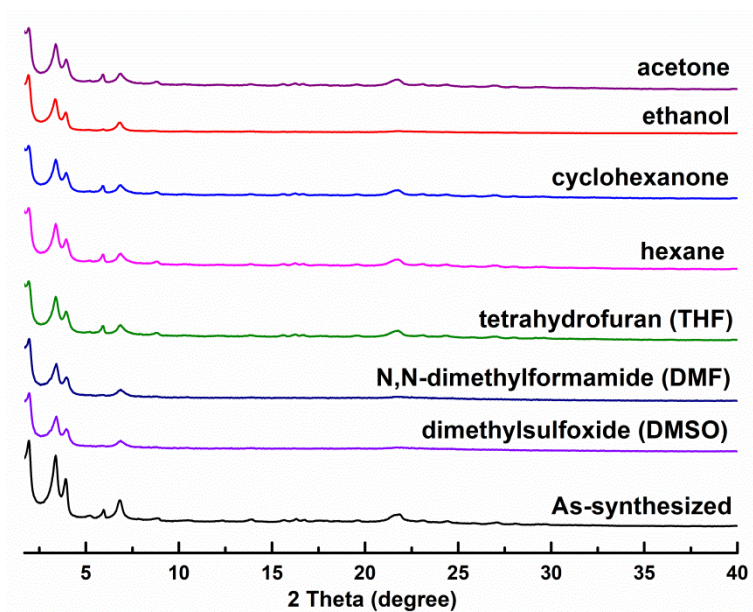

**Figure S18.** PXRD patterns of JUC-561 after the treatment in different organic solvents for 24 h.

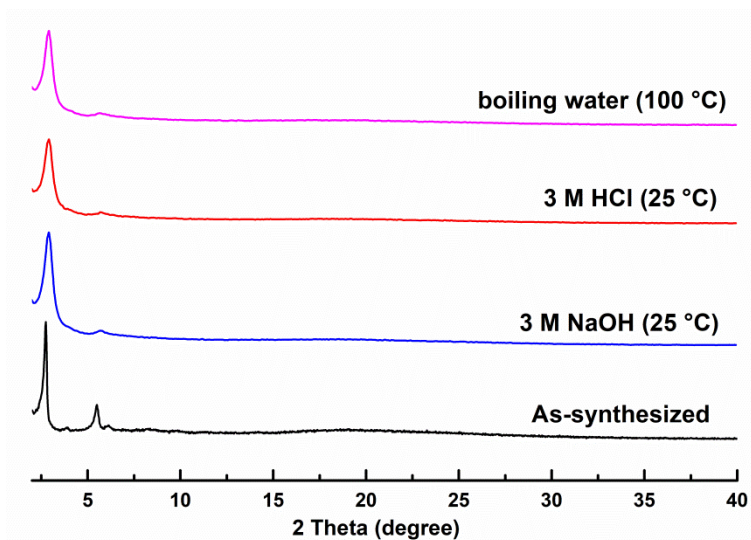

**Figure S19.** PXRD patterns of JUC-560 after the treatment in boiling water (100 °C), strong acid (3 M HCl, 25 °C) and strong base (3 M NaOH, 25 °C) for 24 h.

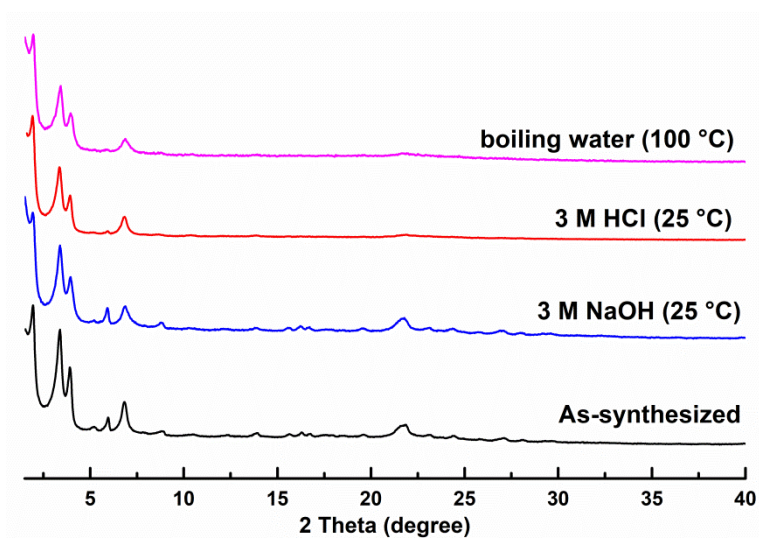

**Figure S20.** PXRD patterns of JUC-561 after the treatment in boiling water (100 °C), strong acid (3 M HCl, 25 °C) and strong base (3 M NaOH, 25 °C) for 24 h.

## Section 8: Thermal gravity analysis

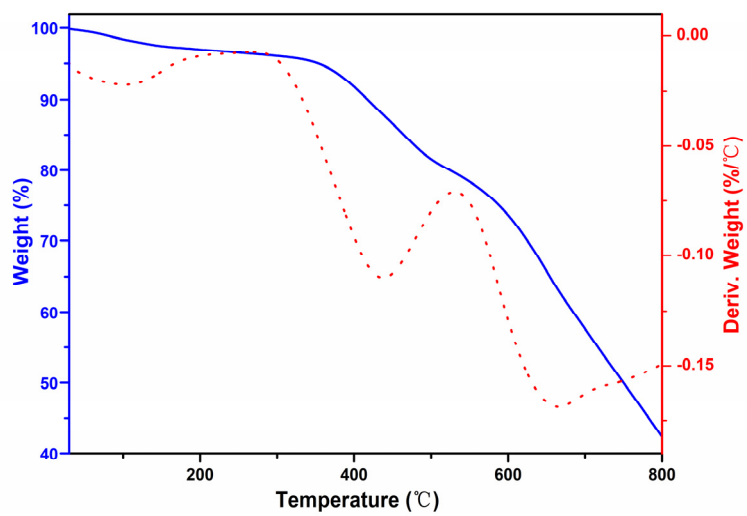

Figure S21. TGA curve of JUC-560.

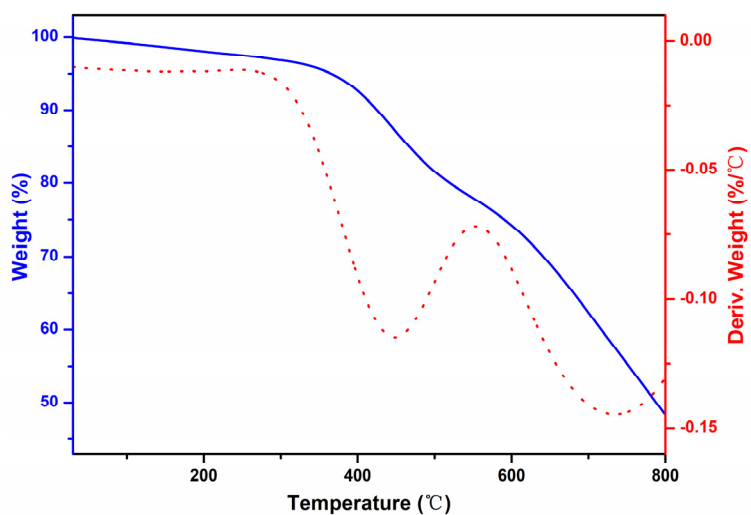

Figure S22. TGA curve of JUC-561.

## Section 9. Nitrogen gas adsorption

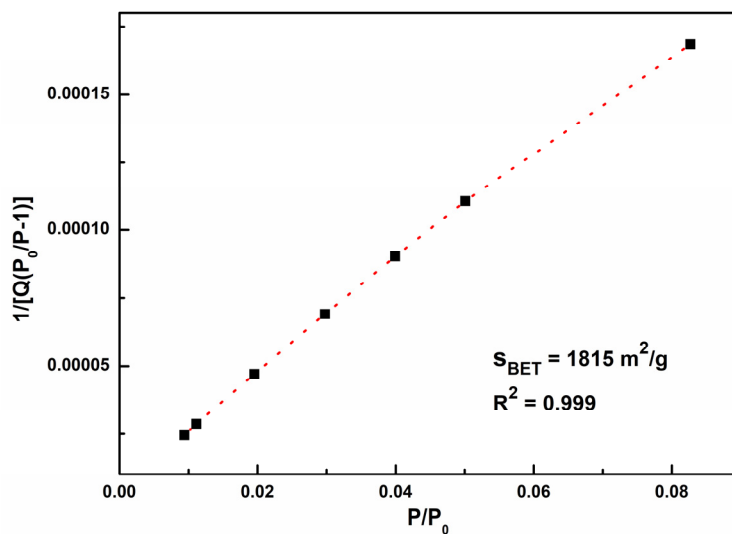

**Figure S23.** BET plot of JUC-560 calculated from  $N_2$  adsorption isotherm at 77 K.

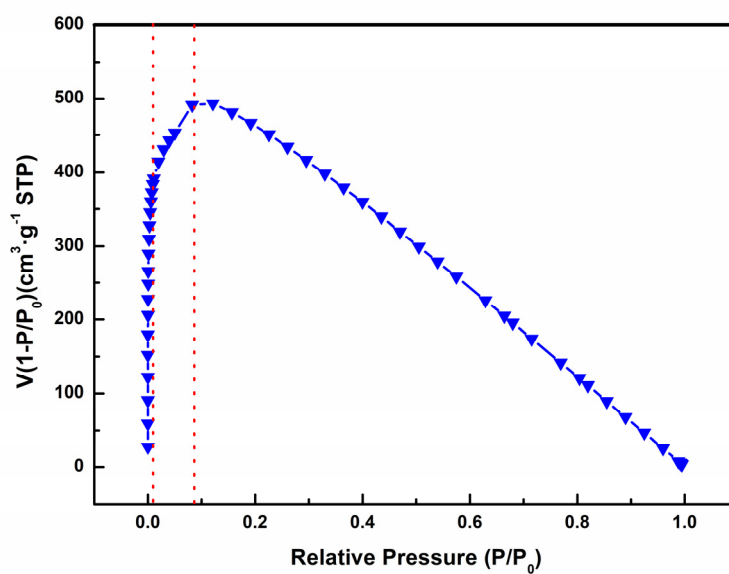

**Figure S24.** Rouquerol BET of JUC-560 calculated from  $N_2$  adsorption isotherm at 77 K.

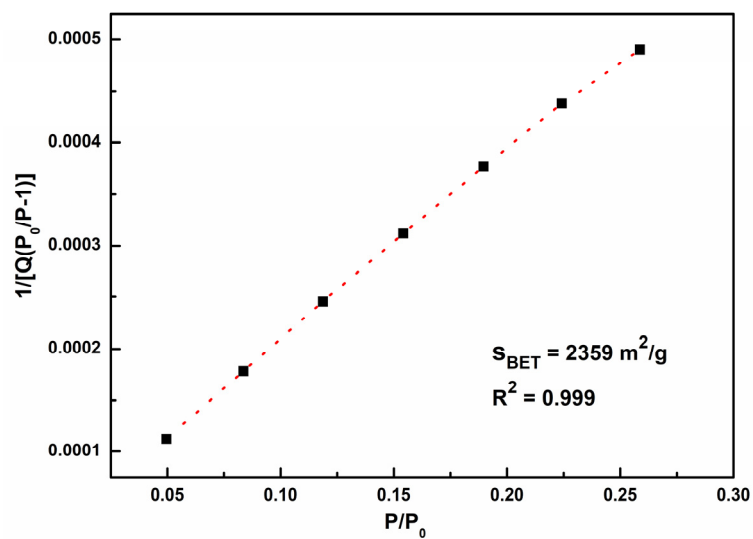

**Figure S25.** BET plot of JUC-561 calculated from  $\text{N}_2$  adsorption isotherm at 77 K.

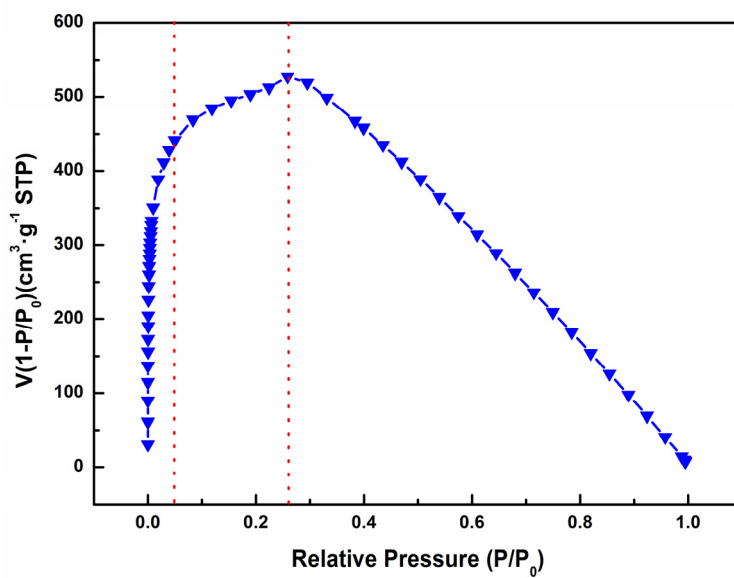

**Figure S26.** Rouquerol BET of JUC-560 calculated from  $\text{N}_2$  adsorption isotherm at 77 K.



## Section10. Adsorption of iodine

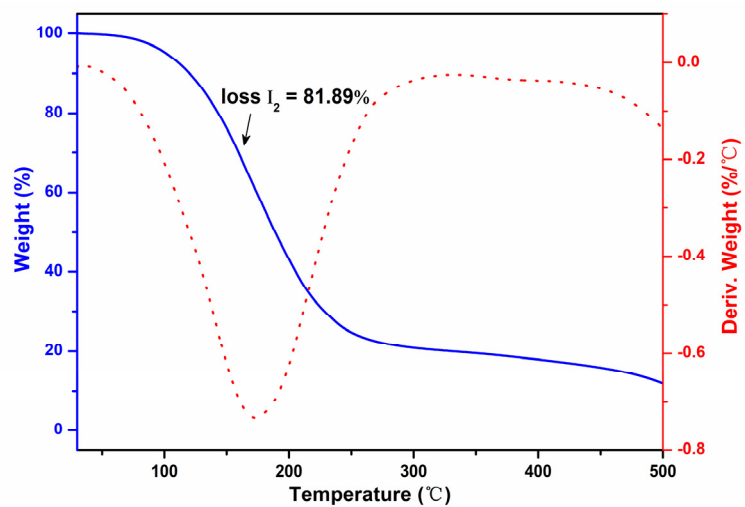

Figure S27. TGA curve of JUC-560 after iodine capture.

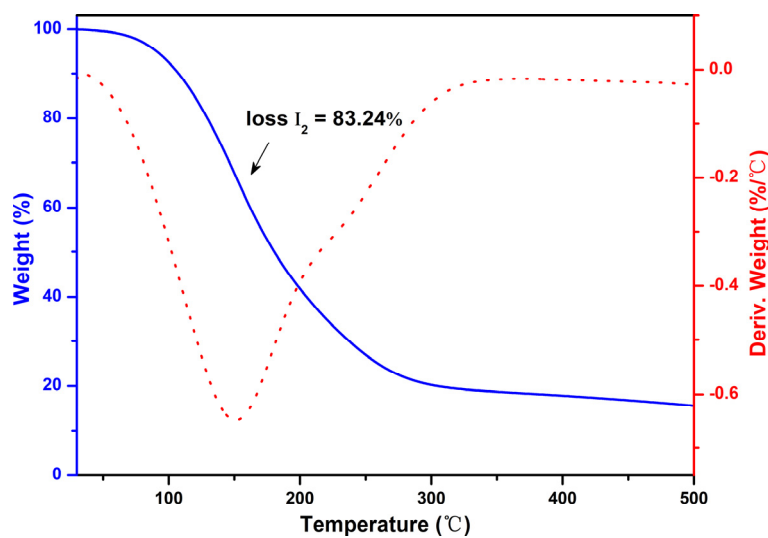

Figure S28. TGA curve of JUC-561 after iodine capture.

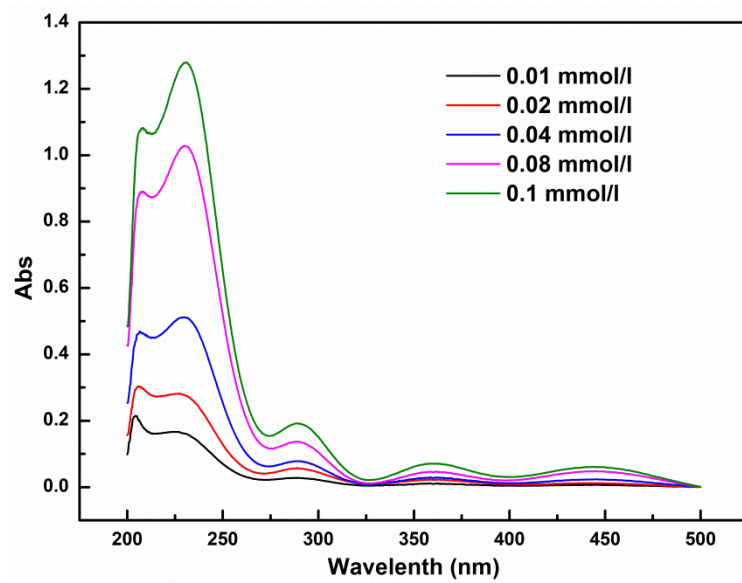

**Figure S29.** UV-Vis spectra of I<sub>2</sub> in ethanol at different concentrations recorded at room temperature, which are the data for a standard curve.

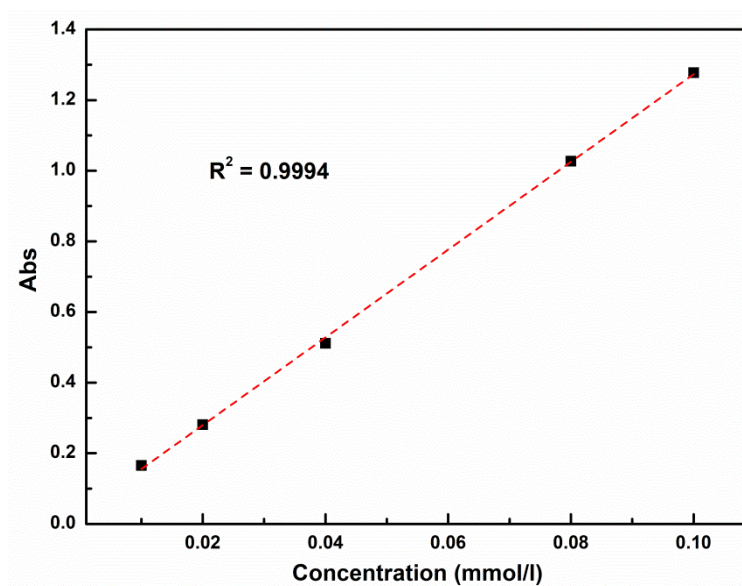

**Figure S30.** Calibration curve of iodine obtained from UV-Vis spectra.

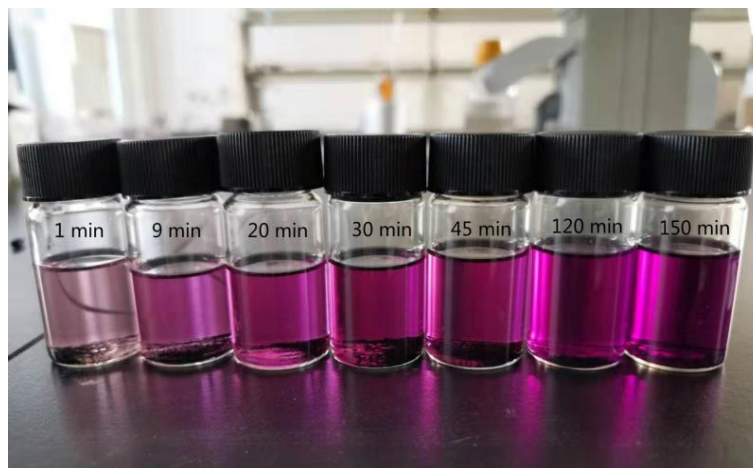

**Figure S31.** Visual detection of iodine release from JUC-560 in ethanol solution.

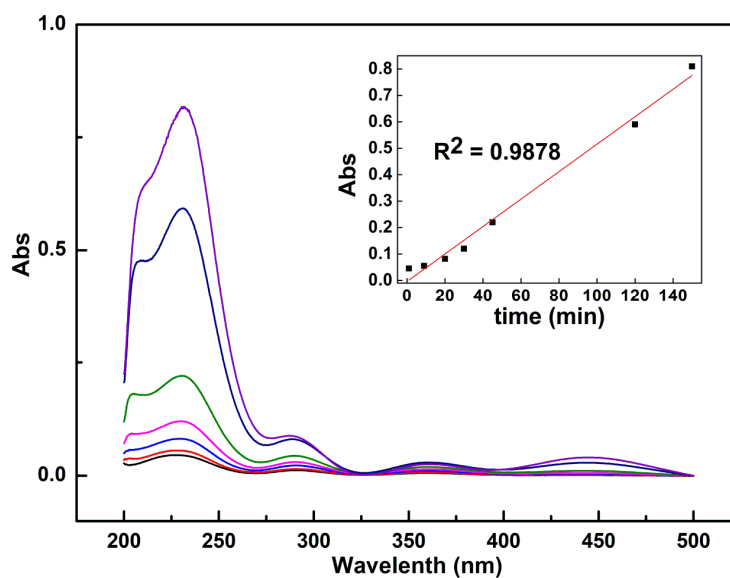

**Figure S32.** UV/Vis spectra of ethanol solutions containing iodine-loaded JUC-560.

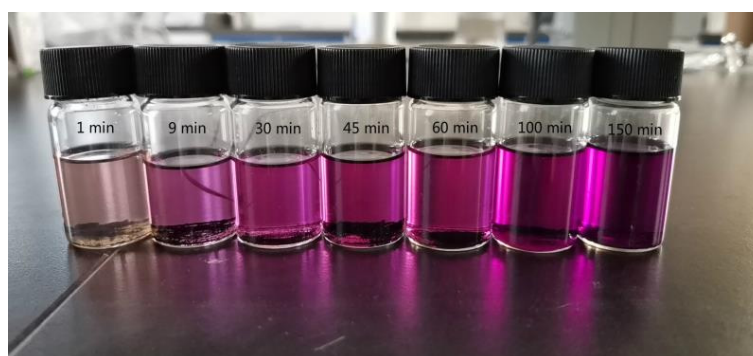

**Figure S33.** Visual detection of iodine release from JUC-561 in ethanol solution.

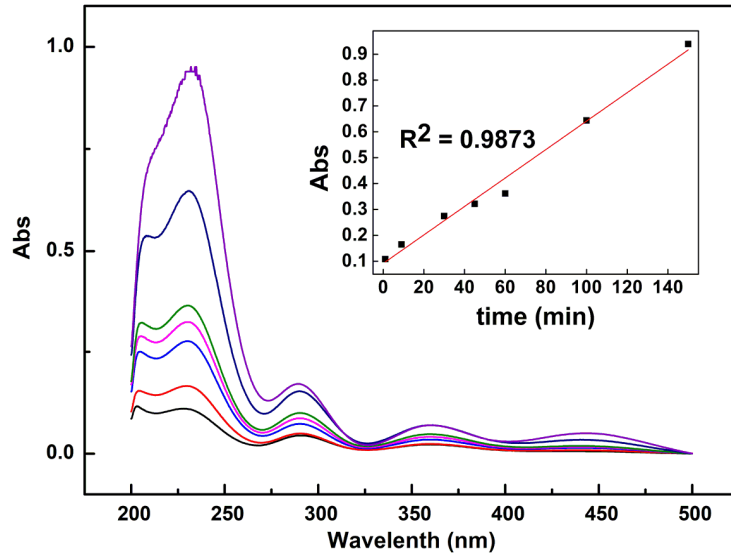

**Figure S34.** UV/Vis spectra of ethanol solutions containing iodine-loaded JUC-561.

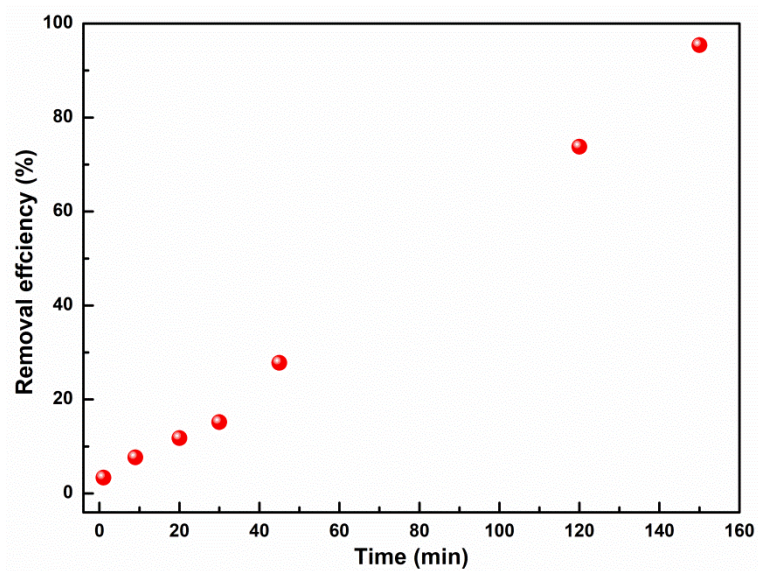

**Figure S35.** Removal efficiency of iodine by JUC-560.

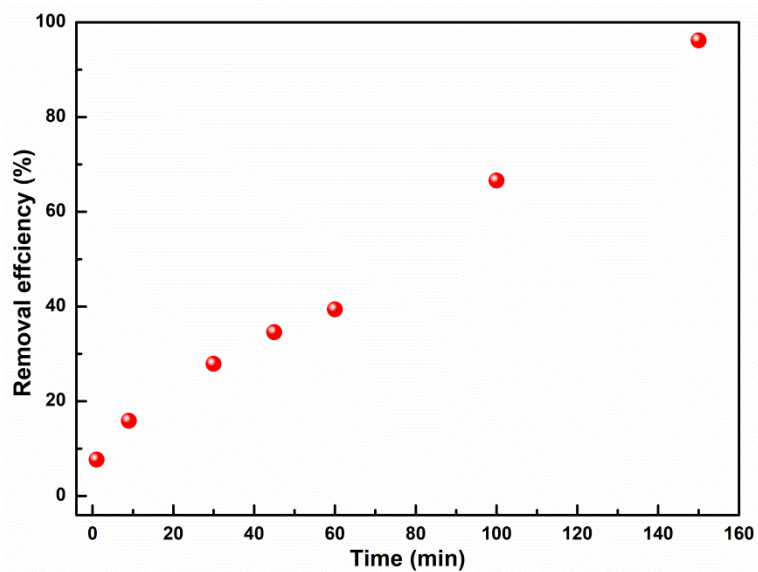

**Figure S36.** Removal efficiency of iodine by JUC-561.

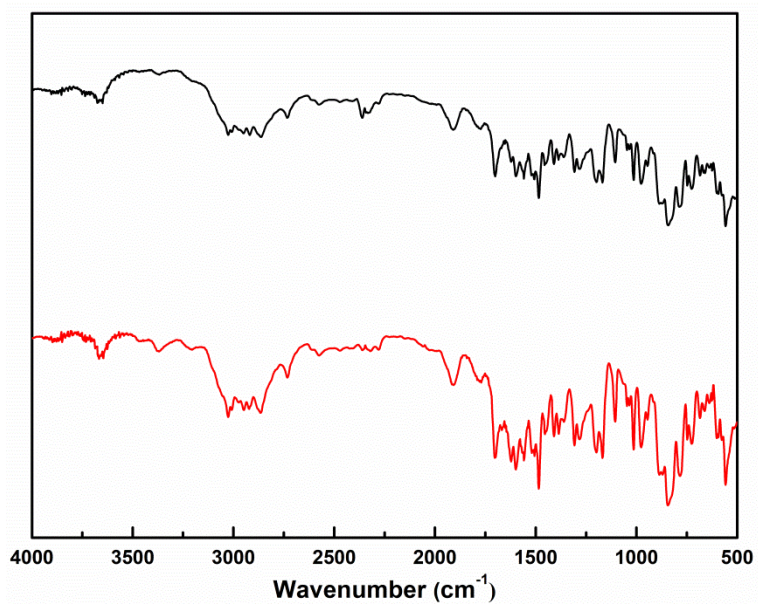

**Figure S37.** Comparison of IR spectroscopy of JUC-560 before (black) and after (red) cyclic application.

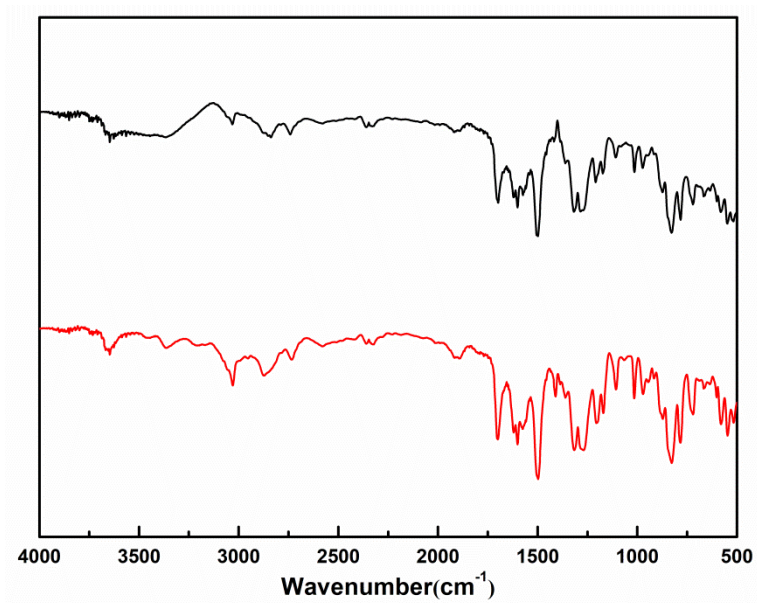

**Figure S38.** Comparison of IR spectroscopy of JUC-561 before (black) and after (red) cycled application.

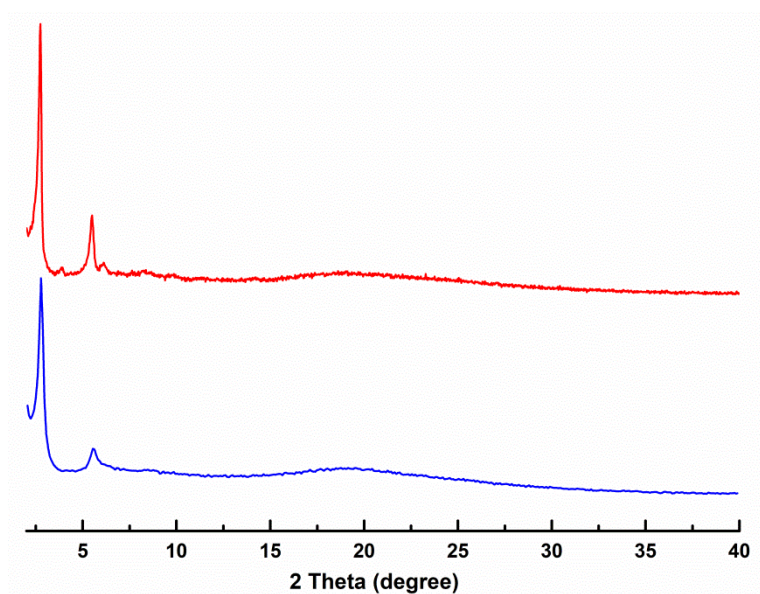

**Figure S39.** Comparison of PXRD patterns of JUC-560 before (red) and after (blue) cycled application.

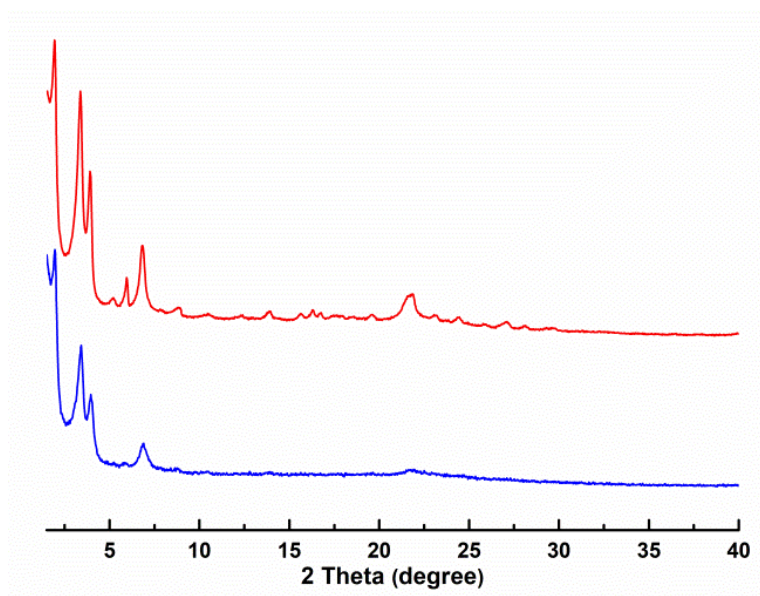

**Figure S40.** Comparison of PXRD patterns of JUC-561 before (red) and after (blue) cycled application.

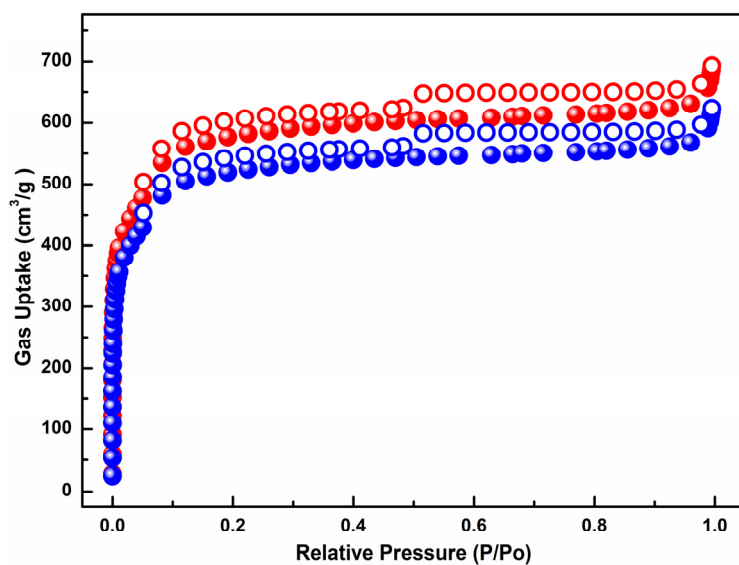

**Figure S41.** Comparison of nitrogen sorption isotherms of JUC-560 before (red) and after (blue) cycled application.

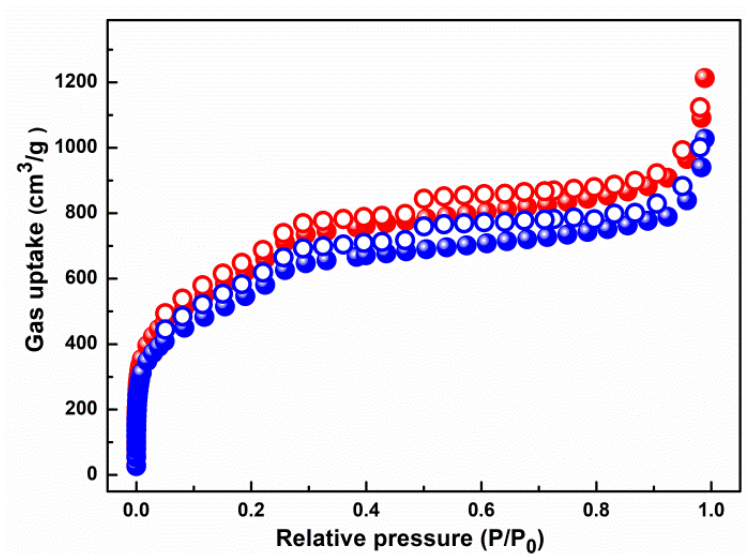

**Figure S42.** Comparison of nitrogen sorption isotherms of JUC-561 before (red) and after (blue) cycled application.

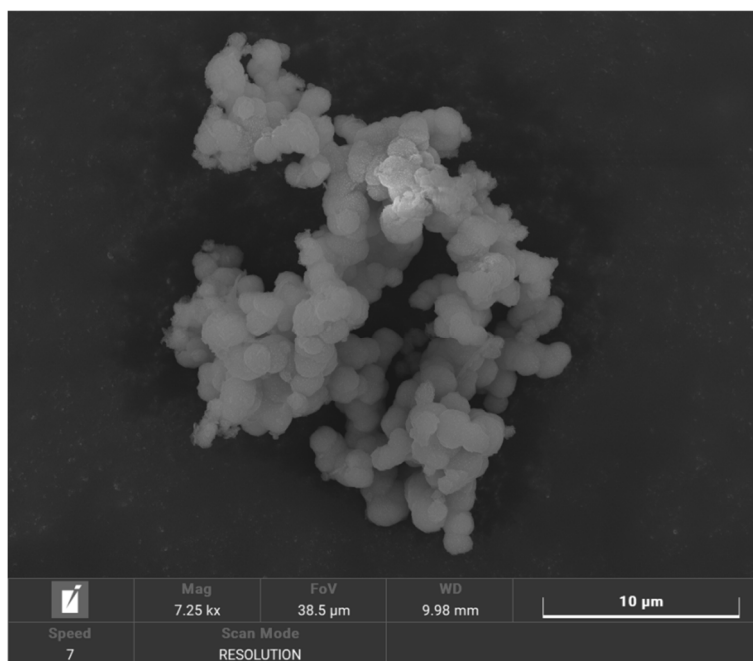

**Figure S43.** SEM image of I<sub>2</sub>@JUC-560.



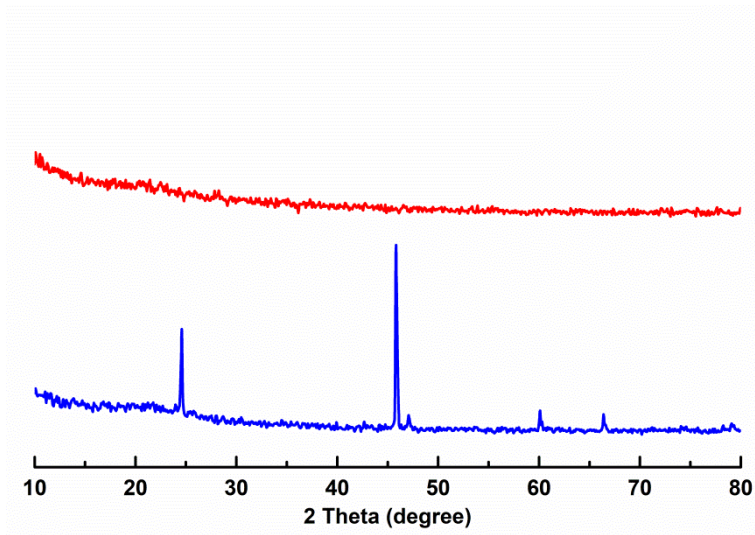

**Figure S44.** Comparison of PXRd patterns of I<sub>2</sub>@JUC-560 (red) and I<sub>2</sub> (blue).

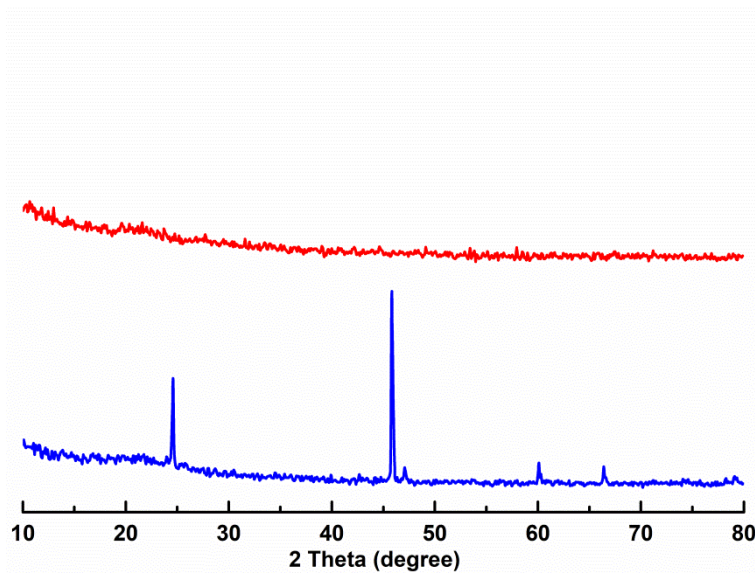

**Figure S45.** Comparison of PXRd patterns of I<sub>2</sub>@JUC-561 (red) and I<sub>2</sub> (blue).

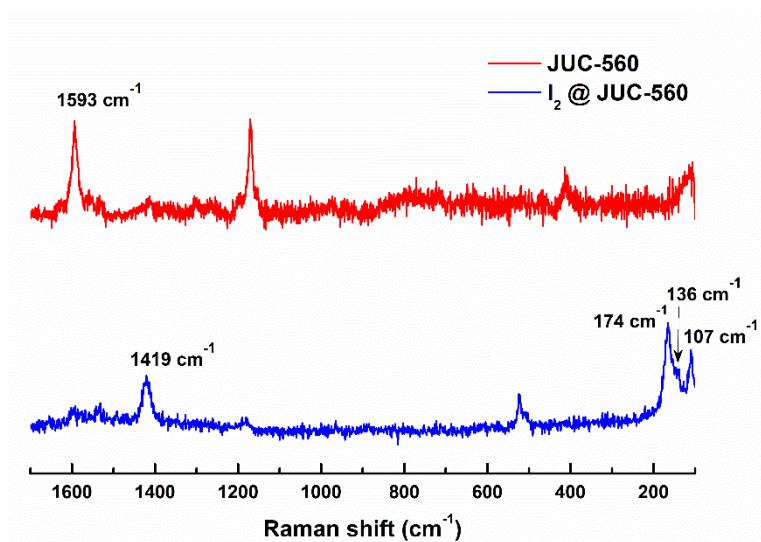

**Figure S46.** The full Raman spectra of the pristine (red) and iodine-loaded JUC-560 (blue). For the pristine COF-560, a symmetric vibration of TTF at 1593 cm<sup>-1</sup> could be observed. After loading I<sub>2</sub>, the symmetric vibration of TTF almost disappeared, and a new peak for the oxidation state of TTF at 1419 cm<sup>-1</sup> appeared, which clearly indicates the complete charge-transfer from TTF to I<sub>2</sub>.

**Table S1.** Comparison of experimental and simulated values of JUC-560 and JUC-561.

|                |              | Pore size (nm) | Pore volume (cm <sup>3</sup> g <sup>-1</sup> ) | Iodine uptake (g g <sup>-1</sup> ) |
|----------------|--------------|----------------|------------------------------------------------|------------------------------------|
| <b>JUC-560</b> | experimental | 2.54           | 1.11                                           | 5.17                               |
|                | theoretical  | 2.62           | 1.16                                           | 5.47                               |
| <b>JUC-561</b> | experimental | 2.46           | 1.92                                           | 8.15                               |
|                | theoretical  | 2.55           | 2.04                                           | 9.47                               |

**Table S2.** Summary of iodine adsorption capacity for reported adsorbents.

| Adsorbent                          | Temperature (°C) | I <sub>2</sub> uptake (g g <sup>-1</sup> ) | BET (m <sup>2</sup> g <sup>-1</sup> ) | Ref              |
|------------------------------------|------------------|--------------------------------------------|---------------------------------------|------------------|
| <b>JUC-561</b>                     | <b>75</b>        | <b>8.19</b>                                | <b>2358</b>                           | <b>This work</b> |
| <b>TFB-DB COF</b>                  | 75               | 6.4                                        | 734                                   | S4               |
| <b>QTD-COF-V</b>                   | 75               | 6.29                                       | -                                     | S5               |
| <b>TPB-DMTP</b>                    | 75               | 6.26                                       | 1927                                  | S6               |
| <b>SCU-COF-2</b>                   | 75               | 6.0                                        | 413                                   | S7               |
| <b>TJNU-201</b>                    | 77               | 5.625                                      | 2510                                  | S8               |
| <b>COF-LZU1</b>                    | 77               | 5.30                                       | 858                                   | S9               |
| <b>JUC-560</b>                     | <b>75</b>        | <b>5.20</b>                                | <b>1815</b>                           | <b>This work</b> |
| <b>TAPA-PDA COF</b>                | 77               | 5.09                                       | 685                                   | S10              |
| <b>TTA-TTB</b>                     | 75               | 4.95                                       | 1733                                  | S6               |
| <b>ETTA-TPA</b>                    | 75               | 4.79                                       | 1822                                  | S6               |
| <b>PCMP-Y5</b>                     | 85               | 4.75                                       | 1212                                  | S11              |
| <b>COF-DL229</b>                   | 75               | 4.7                                        | 1749                                  | S12              |
| <b>H-C-CTPs</b>                    | 75               | 4.6                                        | 640                                   | S13              |
| <b>CMP-LS5</b>                     | 70               | 4.4                                        | 1185                                  | S14              |
| <b>COF-320</b>                     | 75               | 4.0                                        | 2400                                  | S15              |
| <b>Meso-COF-3</b>                  | 75               | 4.0                                        | 982                                   | S15              |
| <b>COP<sub>1</sub><sup>0</sup></b> | 60               | 3.80                                       | -                                     | S16              |
| <b>KOH-AC</b>                      | 77               | 3.76                                       | 1973                                  | S17              |
| <b>TFBCz-PDA</b>                   | 75               | 3.7                                        | 1441                                  | S6               |
| <b>Meso-COF-2</b>                  | 75               | 3.5                                        | 1056                                  | S15              |
| <b>COF-300</b>                     | 75               | 3.5                                        | 1360                                  | S15              |
| <b>HCMP-3</b>                      | 85               | 3.36                                       | 50                                    | S18              |
| <b>CMP-LS4</b>                     | 70               | 3.32                                       | 462                                   | S14              |
| <b>Meso-COF-4</b>                  | 75               | 3.3                                        | 926                                   | S15              |
| <b>Azo-PPN</b>                     | 77               | 2.90                                       | 400                                   | S19              |
| <b>Meso-COF-1</b>                  | 75               | 2.90                                       | 816                                   | S14              |
| <b>PAF-24</b>                      | 75               | 2.76                                       | 321                                   | S20              |
| <b>PAF-23</b>                      | 75               | 2.71                                       | 273                                   | S20              |
| <b>TTA-TFB</b>                     | 75               | 2.7                                        | 1163                                  | S6               |
| <b>COF-TpgDB</b>                   | 75               | 2.6                                        | 210                                   | S21              |
| <b>PAF-25</b>                      | 75               | 2.60                                       | 403                                   | S20              |

|                                                       |    |      |      |     |
|-------------------------------------------------------|----|------|------|-----|
| <b>TpPa-1</b>                                         | 77 | 2.45 | 765  | S9  |
| <b>CMP-LS6</b>                                        | 70 | 2.44 | 679  | S14 |
| <b>Cg-5C</b>                                          | 25 | 2.39 | 360  | S22 |
| <b>Azo-Trip</b>                                       | 77 | 2.38 | 501  | S23 |
| <b>Uassis-PC800</b>                                   | 77 | 2.25 | 3053 | S24 |
| <b>NiMoS<br/>chalcogels</b>                           | 60 | 2.25 | 490  | S25 |
| <b>BN foam</b>                                        | 77 | 2.12 | 561  | S26 |
| <b>MALP-1</b>                                         | 77 | 2.09 | 1179 | S27 |
| <b>CMPN-3</b>                                         | 70 | 2.08 | 1368 | S28 |
| <b>MALP-4</b>                                         | 77 | 2.04 | 1093 | S27 |
| <b>NiP-CMP</b>                                        | 77 | 2.02 | 2630 | S29 |
| <b>MALP-3</b>                                         | 77 | 1.87 | 1141 | S27 |
| <b>NTP</b>                                            | 75 | 1.80 | 1067 | S30 |
| <b>ZIF-8</b>                                          | 75 | 1.20 | 1875 | S31 |
| <b>[Cd<sub>2</sub>(COO)<sub>4</sub>N<sub>4</sub>]</b> | 50 | 0.66 | 1105 | S32 |
| <b>HKUST-1</b>                                        | 75 | 0.64 | 1798 | S33 |
| <b>Ag<sup>+</sup>@Zeolite<br/>Mordenitres</b>         | 95 | 0.28 | -    | S34 |

**Table S3.** Estimated iodine adsorption kinetics of reported adsorbents.

| <b>Porous adsorbent</b>              | <b>Rate constant (g g<sup>-1</sup> h<sup>-1</sup>)</b> | <b>Ref</b>       |
|--------------------------------------|--------------------------------------------------------|------------------|
| <b>QTD-COF-V</b>                     | <b>2.51</b>                                            | <b>S5</b>        |
| <b>JUC-561</b>                       | <b>0.70</b>                                            | <b>This work</b> |
| <b>JUC-560</b>                       | <b>0.49</b>                                            | <b>This work</b> |
| <b>SCU-COF-2</b>                     | 0.21                                                   | S7               |
| <b>Azo-PPN</b>                       | 0.18                                                   | S19              |
| <b>NiP-CMP</b>                       | 0.17                                                   | S29              |
| <b>TTA-TTB</b>                       | 0.15                                                   | S6               |
| <b>TFBCz-PDA</b>                     | 0.15                                                   | S6               |
| <b>TTA-TTB</b>                       | 0.14                                                   | S6               |
| <b>TPB-DMTP</b>                      | 0.13                                                   | S6               |
| <b>ETTA-TPA</b>                      | 0.12                                                   | S6               |
| <b>NTP</b>                           | 0.11                                                   | S30              |
| <b>Ag<sup>+</sup>-loaded-Zeolite</b> | 0.02                                                   | S34              |

## Section S11: Electrochemical behavior

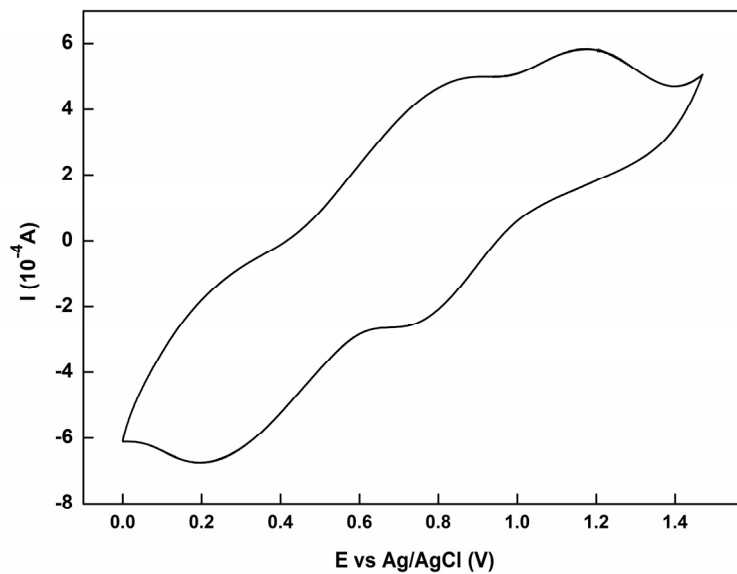

Figure S47. CV of JUC-560.

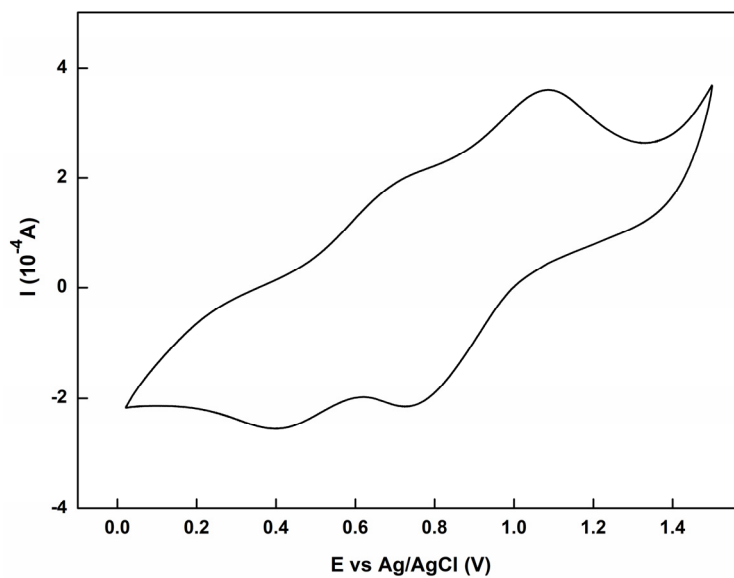

Figure S48. CV of JUC-561.

## Section S12. Theoretical study

**Table S4.** Optimized geometries of TTF·I<sub>2</sub> (a), TTF<sup>•+</sup>·I<sub>2</sub> (b), TTF<sup>•+</sup>·I<sup>-</sup> (c), TTF<sup>•+</sup>·I<sub>3</sub><sup>-</sup> (d), and TTF<sup>•+</sup>·I<sub>5</sub><sup>-</sup> (e).

|          | Interatomic forces | Distance (Å) |
|----------|--------------------|--------------|
| <b>a</b> | I1-C               | 3.758        |
|          | I1-S               | 3.914        |
|          | I2-C               | 3.769        |
|          | I2-S               | 3.924        |
| <b>b</b> | I1-C               | 3.817        |
|          | I1-S               | 4.017        |
|          | I2-C               | 4.058        |
|          | I2-S               | 3.982        |
| <b>c</b> | I-C                | 3.280        |
|          | I-S                | 3.897        |
| <b>d</b> | I1-C               | 3.679        |
|          | I1-S               | 3.959        |
|          | I2-C               | 3.648        |
|          | I3-C               | 3.959        |
|          | I3-S               | 3.774        |
| <b>e</b> | I1-C               | 3.950        |
|          | I2-C               | 3.853        |
|          | I3-C               | 3.689        |
|          | I3-S               | 3.823        |
|          | I4-C               | 3.835        |
|          | I5-C               | 3.718        |

## Section S13: Unit cell parameters

**Table S5.** Unit cell parameters and fractional atomic coordinates for JUC-560 calculated based on the eclipsed **sql** net.

| Space group          |         | <i>Cmmm</i>                                                                                                    |     |
|----------------------|---------|----------------------------------------------------------------------------------------------------------------|-----|
| Calculated unit cell |         | $a = 50.7796 \text{ \AA}, b = 43.0907 \text{ \AA}, c = 3.4757 \text{ \AA}, \alpha = \beta = \gamma = 90^\circ$ |     |
| Measured unit cell   |         | $a = 50.9209 \text{ \AA}, b = 43.2634 \text{ \AA}, c = 3.4837 \text{ \AA}, \alpha = \beta = \gamma = 90^\circ$ |     |
| Pawley refinement    |         | $R_p = 1.31\%, R_{wp} = 2.53\%$                                                                                |     |
| atoms                | x       | y                                                                                                              | z   |
| C1                   | 0.48679 | 0                                                                                                              | 0.5 |
| C2                   | 0.08193 | 0.57157                                                                                                        | 0.5 |
| H3                   | 0.06243 | 0.58124                                                                                                        | 0.5 |
| C4                   | 0.10243 | 0.5931                                                                                                         | 0.5 |
| H5                   | 0.09775 | 0.61751                                                                                                        | 0.5 |
| C6                   | 0.12857 | 0.58316                                                                                                        | 0.5 |
| C7                   | 0.13376 | 0.55156                                                                                                        | 0.5 |
| H8                   | 0.15376 | 0.54308                                                                                                        | 0.5 |
| C9                   | 0.11309 | 0.53044                                                                                                        | 0.5 |
| C10                  | 0.08672 | 0.53915                                                                                                        | 0.5 |
| N11                  | 0.14698 | 0.63467                                                                                                        | 0.5 |
| C12                  | 0.15066 | 0.60503                                                                                                        | 0.5 |
| C13                  | 0.16156 | 0.68822                                                                                                        | 0.5 |
| H14                  | 0.14116 | 0.69531                                                                                                        | 0.5 |
| C15                  | 0.18125 | 0.71071                                                                                                        | 0.5 |
| H16                  | 0.17459 | 0.73429                                                                                                        | 0.5 |
| C17                  | 0.2082  | 0.70253                                                                                                        | 0.5 |
| C18                  | 0.21417 | 0.67054                                                                                                        | 0.5 |
| H19                  | 0.23396 | 0.66188                                                                                                        | 0.5 |
| C20                  | 0.19439 | 0.64817                                                                                                        | 0.5 |
| H21                  | 0.19991 | 0.62401                                                                                                        | 0.5 |
| C22                  | 0.16788 | 0.6569                                                                                                         | 0.5 |
| C23                  | 0.2565  | 0.71882                                                                                                        | 0.5 |
| H24                  | 0.2631  | 0.69521                                                                                                        | 0.5 |
| C25                  | 0.22376 | 0.75876                                                                                                        | 0.5 |
| H26                  | 0.20395 | 0.76737                                                                                                        | 0.5 |
| C27                  | 0.22964 | 0.72688                                                                                                        | 0.5 |
| C28                  | 0.43599 | 1.01604                                                                                                        | 0.5 |
| S29                  | 0.46825 | 1.0347                                                                                                         | 0.5 |
| H30                  | 0.1783  | 0.59182                                                                                                        | 0.5 |

|     |         |         |     |
|-----|---------|---------|-----|
| H31 | 0.12058 | 0.50687 | 0.5 |
|-----|---------|---------|-----|

**Table S6.** Unit cell parameters and fractional atomic coordinates for JUC-560 calculated based on the staggered **sql** net.

| Space group          |         | <i>Fmmm</i>                                                                                                         |     |
|----------------------|---------|---------------------------------------------------------------------------------------------------------------------|-----|
| Calculated unit cell |         | $a = 51.0253 \text{ \AA}, b = 43.2067 \text{ \AA}, c = 6.5014 \text{ \AA},$<br>$\alpha = \beta = \gamma = 90^\circ$ |     |
| atoms                | x       | y                                                                                                                   | z   |
| C1                   | 0.4868  | 0.5                                                                                                                 | 0.5 |
| C2                   | 0.08187 | 0.07172                                                                                                             | 0.5 |
| H3                   | 0.0624  | 0.08139                                                                                                             | 0.5 |
| C4                   | 0.10235 | 0.09329                                                                                                             | 0.5 |
| H5                   | 0.09767 | 0.11774                                                                                                             | 0.5 |
| C6                   | 0.12844 | 0.08333                                                                                                             | 0.5 |
| C7                   | 0.13362 | 0.05168                                                                                                             | 0.5 |
| H8                   | 0.15358 | 0.04319                                                                                                             | 0.5 |
| C9                   | 0.11298 | 0.03052                                                                                                             | 0.5 |
| C10                  | 0.08665 | 0.03923                                                                                                             | 0.5 |
| N11                  | 0.1469  | 0.13493                                                                                                             | 0.5 |
| C12                  | 0.15051 | 0.10523                                                                                                             | 0.5 |
| C13                  | 0.1616  | 0.18854                                                                                                             | 0.5 |
| H14                  | 0.14126 | 0.19572                                                                                                             | 0.5 |
| C15                  | 0.18131 | 0.21098                                                                                                             | 0.5 |
| H16                  | 0.17473 | 0.23463                                                                                                             | 0.5 |
| C17                  | 0.20818 | 0.20268                                                                                                             | 0.5 |
| C18                  | 0.21407 | 0.17062                                                                                                             | 0.5 |
| H19                  | 0.2338  | 0.16188                                                                                                             | 0.5 |
| C20                  | 0.19426 | 0.1483                                                                                                              | 0.5 |
| H21                  | 0.19972 | 0.12409                                                                                                             | 0.5 |
| C22                  | 0.16782 | 0.15714                                                                                                             | 0.5 |
| C23                  | 0.25641 | 0.21875                                                                                                             | 0.5 |
| C24                  | 0.26296 | 0.19509                                                                                                             | 0.5 |
| C25                  | 0.22383 | 0.25889                                                                                                             | 0.5 |
| H26                  | 0.20409 | 0.26762                                                                                                             | 0.5 |
| C27                  | 0.22964 | 0.22696                                                                                                             | 0.5 |
| C28                  | 0.43604 | 0.51608                                                                                                             | 0.5 |
| S29                  | 0.46826 | 0.53476                                                                                                             | 0.5 |
| H30                  | 0.38222 | 0.50532                                                                                                             | 0.5 |



|     |         |         |     |
|-----|---------|---------|-----|
| H31 | 0.71845 | 0.59852 | 0.5 |
|-----|---------|---------|-----|

**Table S7.** Unit cell parameters and fractional atomic coordinates for JUC-561 calculated based on **ffc** net.

| Space group          |         | <i>Cmmm</i>                                                                                                          |         |
|----------------------|---------|----------------------------------------------------------------------------------------------------------------------|---------|
| Calculated unit cell |         | $a = 10.5167 \text{ \AA}, b = 89.0024 \text{ \AA}, c = 26.2881 \text{ \AA},$<br>$\alpha = \beta = \gamma = 90^\circ$ |         |
| Measured unit cell   |         | $a = 10.5223 \text{ \AA}, b = 89.0138 \text{ \AA}, c = 26.2907 \text{ \AA},$<br>$\alpha = \beta = \gamma = 90^\circ$ |         |
| Pawley refinement    |         | $R_p = 3.07\%, R_{wp} = 4.51\%$                                                                                      |         |
| atoms                | x       | y                                                                                                                    | z       |
| C1                   | 0.7416  | 0.75768                                                                                                              | 0.11548 |
| S2                   | 0.77153 | 0.73253                                                                                                              | 0.05831 |
| C3                   | 0.66051 | 0.81505                                                                                                              | 0.43068 |
| C4                   | 0.66451 | 0.80694                                                                                                              | 0.38711 |
| C5                   | 0.75639 | 0.80215                                                                                                              | 0.36822 |
| C6                   | 0.84284 | 0.80523                                                                                                              | 0.39432 |
| C7                   | 0.83885 | 0.81346                                                                                                              | 0.43764 |
| C8                   | 0.74768 | 0.81849                                                                                                              | 0.45587 |
| C9                   | 0.7102  | 0.85183                                                                                                              | 0.45631 |
| C10                  | 0.68754 | 0.86761                                                                                                              | 0.45642 |
| C11                  | 0.70058 | 0.79429                                                                                                              | 0.2886  |
| N12                  | 0.76476 | 0.79388                                                                                                              | 0.32345 |
| C13                  | 0.64573 | 0.78642                                                                                                              | 0.79311 |
| C14                  | 0.65477 | 0.77749                                                                                                              | 0.8348  |
| C15                  | 0.73409 | 0.76717                                                                                                              | 0.84014 |
| C16                  | 0.80611 | 0.7663                                                                                                               | 0.8036  |
| C17                  | 0.79617 | 0.77509                                                                                                              | 0.76151 |
| C18                  | 0.71512 | 0.78514                                                                                                              | 0.75578 |
| C19                  | 0.66673 | 0.92618                                                                                                              | 0.45628 |
| C20                  | 0.62758 | 0.94115                                                                                                              | 0.45628 |
| H21                  | 0.58977 | 0.81875                                                                                                              | 0.44485 |
| H22                  | 0.59585 | 0.80429                                                                                                              | 0.36889 |
| H23                  | 0.91356 | 0.80143                                                                                                              | 0.38049 |
| H24                  | 0.90671 | 0.81606                                                                                                              | 0.45667 |
| H25                  | 0.71923 | 0.84616                                                                                                              | 0.42184 |
| H26                  | 0.67871 | 0.87369                                                                                                              | 0.42255 |
| H27                  | 0.6359  | 0.80165                                                                                                              | 0.29104 |
| H28                  | 0.58437 | 0.79437                                                                                                              | 0.78991 |

|     |         |         |         |
|-----|---------|---------|---------|
| H29 | 0.59903 | 0.77852 | 0.86268 |
| H30 | 0.86964 | 0.75876 | 0.80752 |
| H31 | 0.85168 | 0.774   | 0.73355 |
| H32 | 0.67992 | 0.92036 | 0.4223  |
| H33 | 0.60998 | 0.94669 | 0.4223  |
| C34 | 0.75    | 0.75    | 0.02429 |
| S35 | 0.61445 | 1.01871 | 0.5     |
| C36 | 0.54952 | 1.03686 | 0.5     |
| C37 | 0.67626 | 0.87553 | 0.5     |
| C38 | 0.72077 | 0.8436  | 0.5     |
| C39 | 0.7166  | 0.90239 | 0.5     |
| N40 | 0.65039 | 0.89154 | 0.5     |
| C41 | 0.6063  | 0.94859 | 0.5     |
| C42 | 0.68494 | 0.91857 | 0.5     |
| N43 | 1.24323 | 1.32715 | 0.5     |
| H44 | 1.2949  | 1.39964 | 0.5     |
| C45 | 0.5     | 1.0078  | 0.5     |

**Table S8.** Unit cell parameters and fractional atomic coordinates for JUC-561 calculated based on **tbo** net.

| Space group          |         | <i>Fm-3m</i>                                                              |         |
|----------------------|---------|---------------------------------------------------------------------------|---------|
| Calculated unit cell |         | $a = b = c = 83.4586 \text{ \AA}$<br>$\alpha = \beta = \gamma = 90^\circ$ |         |
| N1                   | 0.33195 | 0.33195                                                                   | 0.33195 |
| C2                   | 0.36298 | 0.32694                                                                   | 0.32694 |
| H3                   | 0.36577 | 0.33593                                                                   | 0.33593 |
| C4                   | 0.37644 | 0.31891                                                                   | 0.31891 |
| H5                   | 0.38851 | 0.32221                                                                   | 0.32221 |
| C6                   | 0.37431 | 0.30674                                                                   | 0.30674 |
| C7                   | 0.35773 | 0.30373                                                                   | 0.30373 |
| H8                   | 0.3549  | 0.29477                                                                   | 0.29477 |
| C9                   | 0.34445 | 0.31166                                                                   | 0.31166 |
| H10                  | 0.33243 | 0.3083                                                                    | 0.3083  |
| C11                  | 0.3463  | 0.32372                                                                   | 0.32372 |
| C12                  | 0.40358 | 0.29713                                                                   | 0.29713 |
| N13                  | 0.3873  | 0.29753                                                                   | 0.29753 |
| C14                  | 0.43291 | 0.28765                                                                   | 0.28765 |
| H15                  | 0.43774 | 0.29616                                                                   | 0.29616 |
| C16                  | 0.44439 | 0.27824                                                                   | 0.27824 |
| H17                  | 0.45688 | 0.28059                                                                   | 0.28059 |

|     |         |         |         |
|-----|---------|---------|---------|
| C18 | 0.44032 | 0.26632 | 0.26632 |
| C19 | 0.42303 | 0.26553 | 0.26553 |
| H20 | 0.41729 | 0.2579  | 0.2579  |
| C21 | 0.41149 | 0.27481 | 0.27481 |
| H22 | 0.39887 | 0.27272 | 0.27272 |
| C23 | 0.41578 | 0.28642 | 0.28642 |
| S24 | 0.47629 | 0.26222 | 0.26222 |
| C25 | 0.4544  | 0.25619 | 0.25619 |
| C26 | 0.49094 | 0.25    | 0.75    |

**Table S9.** Unit cell parameters and fractional atomic coordinates for JUC-561 calculated based on **fjh** net.

| Space group          |         | <i>Fm</i> <i>m</i> <i>m</i>                                                                                          |         |
|----------------------|---------|----------------------------------------------------------------------------------------------------------------------|---------|
| Calculated unit cell |         | $a = 86.5862 \text{ \AA}, b = 98.7415 \text{ \AA}, c = 33.7131 \text{ \AA},$<br>$\alpha = \beta = \gamma = 90^\circ$ |         |
| atoms                | x       | y                                                                                                                    | z       |
| C1                   | 0.27542 | -0.14524                                                                                                             | 0.26433 |
| C2                   | 0.33063 | -0.15788                                                                                                             | 0.26372 |
| C3                   | 0.29539 | -0.19853                                                                                                             | 0.26701 |
| C4                   | 0.28398 | -0.20844                                                                                                             | 0.26634 |
| S5                   | 0.26757 | -0.23373                                                                                                             | 0.25037 |
| C6                   | 0.46311 | -0.13099                                                                                                             | 0.4802  |
| S7                   | 0.48144 | -0.12994                                                                                                             | 0.45454 |
| C8                   | 0.4491  | -0.1427                                                                                                              | 0.42665 |
| C9                   | 0.43701 | -0.14355                                                                                                             | 0.3992  |
| C10                  | 0.42485 | -0.13419                                                                                                             | 0.40031 |
| C11                  | 0.42498 | -0.12396                                                                                                             | 0.42911 |
| C12                  | 0.43718 | -0.12307                                                                                                             | 0.45653 |
| C13                  | 0.44928 | -0.13253                                                                                                             | 0.45536 |
| N14                  | 0.40074 | -0.12717                                                                                                             | 0.37044 |
| C15                  | 0.41276 | -0.13509                                                                                                             | 0.37012 |
| C16                  | 0.37517 | -0.12068                                                                                                             | 0.34654 |
| C17                  | 0.36364 | -0.12063                                                                                                             | 0.31716 |
| C18                  | 0.36604 | -0.12745                                                                                                             | 0.28137 |
| C19                  | 0.38003 | -0.13434                                                                                                             | 0.27488 |
| C20                  | 0.3915  | -0.13451                                                                                                             | 0.30429 |
| C21                  | 0.38912 | -0.12763                                                                                                             | 0.34031 |
| C22                  | 0.17271 | -0.13168                                                                                                             | 0.26621 |
| C23                  | 0.18532 | -0.14066                                                                                                             | 0.26704 |
| C24                  | 0.22298 | -0.1822                                                                                                              | 0.25889 |
| C25                  | 0.23439 | -0.19238                                                                                                             | 0.26004 |

|     |         |          |          |
|-----|---------|----------|----------|
| C26 | 0.13075 | -0.03231 | 0.48012  |
| S27 | 0.13116 | -0.01633 | 0.45446  |
| C28 | 0.1177  | -0.05247 | 0.45089  |
| C29 | 0.11757 | -0.06348 | 0.42486  |
| C30 | 0.13085 | -0.06675 | 0.40342  |
| C31 | 0.14432 | -0.05892 | 0.40878  |
| C32 | 0.14445 | -0.04792 | 0.43481  |
| C33 | 0.13116 | -0.04467 | 0.45625  |
| N34 | 0.14202 | -0.08096 | 0.3527   |
| C35 | 0.13063 | -0.07844 | 0.37665  |
| C36 | 0.13084 | -0.10243 | 0.32717  |
| C37 | 0.13186 | -0.11359 | 0.30164  |
| C38 | 0.14444 | -0.11499 | 0.27561  |
| C39 | 0.15595 | -0.10498 | 0.275    |
| C40 | 0.15499 | -0.0938  | 0.30025  |
| C41 | 0.14247 | -0.09238 | 0.32658  |
| N42 | 0.35473 | 0.12644  | -0.25047 |
| C43 | 0.31625 | -0.15382 | 0.24766  |
| C44 | 0.34162 | -0.13561 | 0.25013  |
| C45 | 0.30483 | -0.17564 | 0.25574  |
| N46 | 0.30326 | -0.16294 | 0.24584  |
| C47 | 0.26886 | -0.20569 | 0.25282  |
| C48 | 0.29211 | -0.18538 | 0.25455  |
| C49 | 0.25787 | -0.21739 | 0.25084  |
| H50 | 0.35467 | 0.84778  | -0.72202 |
| H51 | 0.332   | 0.8314   | -0.72424 |
| H52 | 0.30751 | 0.79886  | -0.72221 |
| H53 | 0.28671 | 0.78086  | -0.72309 |
| H54 | 0.45893 | 0.84962  | -0.57431 |
| H55 | 0.43703 | 0.84813  | -0.62422 |
| H56 | 0.41515 | 0.8837   | -0.56957 |
| H57 | 0.43724 | 0.88533  | -0.52028 |
| H58 | 0.41369 | 0.85709  | -0.65465 |
| H59 | 0.37323 | 0.88494  | -0.62435 |
| H60 | 0.35232 | 0.88498  | -0.67747 |
| H61 | 0.3821  | 0.86017  | -0.7544  |
| H62 | 0.40275 | 0.85977  | -0.701   |
| H63 | 0.31681 | 0.82097  | -0.73433 |
| H64 | 1.17396 | 0.87896  | -0.72113 |
| H65 | 1.19687 | 0.86279  | -0.72026 |
| H66 | 1.22589 | 0.82854  | -0.73125 |
| H67 | 1.24646 | 0.81007  | -0.72853 |
| H68 | 1.10682 | 0.9503   | -0.53188 |

|     |         |          |          |
|-----|---------|----------|----------|
| H69 | 1.10664 | 0.93021  | -0.57883 |
| H70 | 1.15529 | 0.93846  | -0.60826 |
| H71 | 1.15538 | 0.95838  | -0.56148 |
| H72 | 1.12028 | 0.91442  | -0.62348 |
| H73 | 1.12064 | 0.89855  | -0.65163 |
| H74 | 1.12243 | 0.87835  | -0.69814 |
| H75 | 1.16615 | 0.89405  | -0.74618 |
| H76 | 1.16439 | 0.91428  | -0.70034 |
| C77 | 0.50774 | -0.1297  | -0.5     |
| C78 | 0.13115 | 0.0068   | -0.5     |
| C79 | 0.25    | -0.24318 | 0.25     |

## Section S14: References

1. Y. Mitamura, H. Yorimitsu, K. Oshima and A. Osuka, *Chem. Sci.*, 2011, **2**, 2017.
2. W. Meng, J. K. Clegg, J. D. Thoburn and J. R. Nitschke, *J. Am. Chem. Soc.*, 2011, **133**, 13652.
3. A. F. M. El-Mahdy, C.-H. Kuo, A. Alshehri, C. Young, Y. Yamauchi, J. Kim and S.-W. Kuo, *J. Mater. Chem. A*, 2018, **6**, 19532.
4. S. Song, Y. Shi, N. Liu and F. Liu, *ACS Appl. Mater. Interfaces*, 2021, **13**, 10513.
5. X. Guo, Y. Li, M. Zhang, K. Cao, Y. Tian, Y. Qi, S. Li, K. Li, X. Yu and L. Ma, *Angewandte Chemie-International Edition*, 2020, **59**, 22697.
6. P. Wang, Q. Xu, Z. Li, W. Jiang, Q. Jiang and D. Jiang, *Adv. Mater.*, 2018, **30**, 1801991.
7. L. He, L. Chen, X. Dong, S. Zhang, M. Zhang, X. Dai, X. Liu, P. Lin, K. Li, C. Chen, T. Pan, F. Ma, J. Chen, M. Yuan, Y. Zhang, L. Chen, R. Zhou, Y. Han, Z. Chai and S. Wang, *Chem*, 2021, **7**, 699.
8. J. Li, H. Zhang, L. Zhang, K. Wang, Z. Wang, G. Liu, Y. Zhao and Y. Zeng, *J. Mater. Chem. A*, 2020, **8**, 9523.
9. Y. Yang, X. Xiong, Y. Fan, Z. Lai, Z. Xu and F. Luo, *J. Solid State Chem.*, 2019, **279**, 120979.
10. R. Chen, T. Hu, W. Zhang, C. He and Y. Li, *Microporous Mesoporous Mater.*, 2021, **312**, 110739.
11. H. Zuo, W. Lyu, W. Zhang, Y. Li and Y. Liao, *Macromol. Rapid Commun.*, 2020, **41**, 2000489.
12. C. Wang, Y. Wang, R. L. Ge, X. D. Song, X. Q. Xing, Q. K. Jiang, H. Lu, C. Hao, X. W. Guo, Y. A. Gao and D. L. Jiang, *Chem.-Eur. J.*, 2018, **24**, 585.
13. Y. Xu, H. Yu, B. Shi, S. Gao, L. Zhang, X. Li, X. Liao and K. Huang, *Acs Applied Polymer Materials*, 2020, **2**, 3704.
14. S. Wang, Y. Liu, Y. Ye, X. Meng, J. Du, X. Song and Z. Liang, *Polym. Chem.*, 2019, **10**, 2608.

15. S. An, X. Zhu, Y. He, L. Yang, H. Wang, S. Jin, J. Hu and H. Liu, *Ind. Eng. Chem. Res.*, 2019, **58**, 10495.
16. G. Das, T. Prakasam, S. Nuryyeva, D. S. Han, A. Abdel-Wahab, J.-C. Olsen, K. Polychronopoulou, C. Plataslglesias, F. Ravaux, M. Jouiad and A. Trabolsi, *J. Mater. Chem. A*, 2016, **4**, 15361.
17. H. Sun, P. La, Z. Zhu, W. Liang, B. Yang and A. Li, *J. Mater. Sci.*, 2015, **50**, 7326.
18. Y. Liao, J. Weber, B. M. Mills, Z. Ren and C. F. J. Faul, *Macromolecules*, 2016, **49**, 6322.
19. H. Li, X. Ding and B. H. Han, *Chem. Eur. J.*, 2016, **22**, 11863.
20. Z. Yan, Y. Yuan, Y. Tian, D. Zhang and G. Zhu, *Angew. Chem. Int. Ed.*, 2015, **54**, 12733.
21. Y. Sun, S. Song, D. Xiao, L. Gan and Y. Wang, *Acs Omega*, 2020, **5**, 24262.
22. B. J. Riley, J. Chun, J. V. Ryan, J. Matyáš, X. S. Li, D. W. Matson, S. K. Sundaram, D. M. Strachan and J. D. Vienna, *RSC Adv.*, 2011, **1**, 1704.
23. Q.-Q. Dang, X.-M. Wang, Y.-F. Zhan and X.-M. Zhang, *Polym. Chem.*, 2016, **7**, 643.
24. K. Xiao, H. Liu, Y. Li, G. Yang, Y. Wang and H. Yao, *Chem. Eng. J.*, 2020, **382**, 122997.
25. K. S. Subrahmanyam, D. Sarma, C. D. Malliakas, K. Polychronopoulou, B. J. Riley, D. A. Pierce, J. Chun and M. G. Kanatzidis, *Chem. Mater.*, 2015, **27**, 2619.
26. G. Li, Y. Huang, J. Lin, C. Yu, Z. Liu, Y. Fang, Y. Xue and C. Tang, *Chem. Eng. J.*, 2020, **382**, 122833.
27. M. Rong, L. Yang, L. Wang, H. Xing, J. Yu, H. Qu and H. Liu, *Ind. Eng. Chem. Res.*, 2019, **58**, 17369.
28. Y. Chen, H. Sun, R. Yang, T. Wang, C. Pei, Z. Xiang, Z. Zhu, W. Liang, A. Li and W. Deng, *J. Mater. Chem. A*, 2015, **3**, 87.

29. A. Sigen, Y. Zhang, Z. Li, H. Xia, M. Xue, X. Liu and Y. Mu, *Chem. Commun.*, 2014, **50**, 8495.
30. H. Ma, J.-J. Chen, L. Tan, J.-H. Bu, Y. Zhu, B. Tan and C. Zhang, *ACS Macro. Lett.*, 2016, **5**, 1039.
31. D. F. Sava, T. J. Garino and T. M. Nenoff, *Ind. Eng. Chem. Res.*, 2012, **51**, 614.
32. B.-B. Shi, R.-Z. Pei, A.-W. Chen, C. Wang, Y.-M. Ma and Z. Yin, *Inorg. Chem. Commun.*, 2019, **102**, 147.
33. D. F. Sava, K. W. Chapman, M. A. Rodriguez, J. A. Greathouse, P. S. Crozier, H. Zhao, P. J. Chupas and T. M. Nenoff, *Chem. Mater.*, 2013, **25**, 2591.
34. K. W. Chapman, P. J. Chupas and T. M. Nenoff, *J. Am. Chem. Soc.*, 2010, **132**, 8897.
